1 The nitrogen phosphotransferase regulator PtsN (EIIA<sup>Ntr</sup>) regulates inorganic  
2 polyphosphate production in *Escherichia coli*.

3

4 Marvin Q. Bowlin <sup>a,\*</sup>, Abigail R. Long <sup>a,\*</sup>, Joshua T. Huffines <sup>a</sup>, and Michael J. Gray<sup>a,#</sup>

5

6 Department of Microbiology, School of Medicine, University of Alabama at Birmingham,

7 Birmingham, AL 35294 <sup>a</sup>

8

9 Running Head: PtsN regulates polyP synthesis

10

11 \* These authors contributed equally to this work. Author order was determined

12 alphabetically.

13 # Address correspondence to Michael J. Gray, [mjgray@uab.edu](mailto:mjgray@uab.edu)

14 **ABSTRACT**

15 Inorganic polyphosphate (polyP) is synthesized by bacteria under stressful  
16 environmental conditions and acts by a variety of mechanisms to promote cell survival.  
17 While the kinase that synthesizes polyP (PPK, encoded by the *ppk* gene) is well  
18 known, little is understood about how environmental stress signals lead to activation of  
19 this enzyme. Previous work has shown that the transcriptional regulators DksA, RpoN  
20 ( $\sigma^{54}$ ), and RpoE ( $\sigma^{24}$ ) positively regulate polyP production, but not *ppk* transcription, in  
21 *Escherichia coli*. In this work, we set out to examine the role of the alternative sigma  
22 factor RpoN and nitrogen starvation stress response pathways in controlling polyP  
23 synthesis in more detail. In the course of these experiments, we identified GlnG, GlrR,  
24 PhoP, PhoQ, RapZ, and GlmS as proteins that affect polyP production, and uncovered  
25 a central role for the nitrogen phosphotransferase regulator PtsN (EIIA<sup>Ntr</sup>) in a polyP  
26 regulatory pathway, acting upstream of DksA, downstream of RpoN, and apparently  
27 independently of RpoE. However, none of these regulators appears to act directly on  
28 PPK, and the mechanism(s) by which they modulate polyP production remain unclear.  
29 Unexpectedly, we also found that the pathways that regulate polyP production vary  
30 depending not only on the stress condition applied, but also on the composition of the  
31 media in which the cells were grown before exposure to polyP-inducing stress. These  
32 results constitute substantial progress towards deciphering the regulatory networks  
33 driving polyP production under stress, but highlight the remarkable complexity of this  
34 regulation and its connections to a broad range of stress-sensing pathways.

35

36 **IMPORTANCE**

37 Bacteria respond to changes in their environments with a complex regulatory network  
38 that controls the expression and activity of a wide range of effectors important for their  
39 survival. This stress response network is critical for the virulence of pathogenic bacteria  
40 and for the ability of all bacteria to grow in natural environments. Inorganic  
41 polyphosphate (polyP) is an evolutionarily ancient and almost universally conserved  
42 stress response effector that plays multiple roles in virulence, stress response, and  
43 survival in diverse organisms. This work provides new insights into the connections  
44 between well characterized nitrogen starvation and cell envelope stress response  
45 signaling pathways and the production of polyP in *Escherichia coli*.

46

## 47 **INTRODUCTION**

48 Inorganic polyphosphate (polyP) is a biopolymer of up to hundreds of phosphate units  
49 that is produced by organisms of all domains of life (1-3). In bacteria, polyP has been  
50 known to be required for stress response and virulence for decades (4-6), and recent  
51 work has begun to decipher molecular mechanisms by which bacterial polyP directly  
52 disrupts phagocytic cell functions important in the host immune response to bacterial  
53 infections (7-11). These results have led to a growing interest in polyP metabolism and  
54 the recent identification of a range of chemicals that inhibit the bacterial polyP kinases  
55 (PPKs) responsible for polyP synthesis as promising potential anti-virulence drug  
56 candidates (7, 12-15).

57

58 Despite this, relatively little is known about how polyP production is regulated in  
59 bacteria. In the model organism *Escherichia coli*, polyP is undetectable during

60 exponential growth in rich medium, but is synthesized rapidly upon exposure to a variety  
61 of stress conditions, including severe oxidative stress, heat shock, salt stress, and  
62 multiple types of starvation stresses (16-18). Early work identified a few regulators in *E.*  
63 *coli* that affected polyP synthesis under different conditions, but did not establish the  
64 mechanisms by which these acted (16, 19, 20). In *E. coli*, PPK and the polyP-degrading  
65 enzyme exopolyPase (PPX) are encoded in a bicistronic operon (21) whose  
66 transcription does not increase upon stress treatment (17, 22, 23). However, our  
67 previous results have shown that transcriptional regulators are required for robust polyP  
68 production in response to a nutrient limitation stress in which exponential-phase cultures  
69 of *E. coli* are shifted from rich medium into phosphate-limited glucose minimal medium  
70 (16). These include the RNA polymerase-binding protein DksA (24) and the stress-  
71 responsive alternative sigma factors RpoE and RpoN (22). These observations led us to  
72 hypothesize that these transcription factors regulate the expression of genes or proteins  
73 responsible for directly activating PPK activity under stress conditions. However, the  
74 transcriptional response to nutrient limitation is complex, and transcriptomics have not  
75 allowed us to identify any such directly-acting regulators to date (22).

76

77 The experiments described in this paper were aimed at deciphering the role of RpoN-  
78 dependent genes in polyP regulation. RpoN is the *E. coli*  $\sigma^{54}$ -family sigma factor, and is  
79 notable for requiring additional ATPase proteins for activation of transcription at specific  
80 promoters (25, 26). These bacterial enhancer binding proteins (bEBPs) control specific  
81 and well-defined regulons in *E. coli* (27), and we hypothesized that by determining

82 which bEBP(s) were necessary for polyP production we would be able to identify  
83 specific RpoN-dependent polyP regulators.

84

85 In the course of testing this hypothesis, we discovered that the bEBP GlnG, involved in  
86 the classical nitrogen starvation response in *E. coli* (28), is a positive regulator of polyP  
87 synthesis, but that this activity and the effect of RpoN on polyP synthesis are  
88 suppressed by the presence of glutamine in the rich medium before nutrient limitation,  
89 growth conditions under which polyP is not being produced. Further studies revealed  
90 that glutamine had a significant effect on which regulatory pathways were required for  
91 polyP synthesis after nutrient limitation, and that this was true not only of RpoN and  
92 GlnG, but also of RapZ, a regulator of the peptidoglycan precursor synthesis enzyme  
93 GlnS (29). The cell envelope stress responsive regulators GlrR (30-32) and PhoP (33)  
94 both also impacted polyP production, acting as negative regulators. By examining  
95 known nitrogen-responsive regulatory systems in *E. coli*, we identified a key role for the  
96 nitrogen phosphotransferase regulator PtsN (EIIA<sup>Ntr</sup>) (34) as an activator of polyP  
97 synthesis that acts downstream of RpoN, upstream of DksA, and apparently  
98 independently of RpoE.

99

100 The results of these studies are new insights into the network of regulators involved in  
101 modulating polyP production in *E. coli* and an increased appreciation that media  
102 composition can impact not only the extent of polyP synthesis but also the regulators  
103 involved in controlling that synthesis. However, all of the regulators we have identified

104 so far appear to act indirectly, and we have yet to identify the genes, proteins, or  
105 metabolites directly responsible for activation of PPK under stress conditions.

106

## 107 **RESULTS**

108 **The bEBPs GlnG and GlnR influence polyP production.** As we have previously  
109 reported (22),  $\Delta rpoN$  mutant *E. coli* had a significant defect in polyP synthesis upon  
110 nutrient limitation stress (Fig. 1A). Expression of *rpoN* from a plasmid rescued this  
111 phenotype, but did not increase polyP production in a wild-type strain (Fig. 1A). RpoN-  
112 dependent promoters require bEBPs (25, 26), so to narrow down the identity of the  
113 RpoN-dependent gene(s) involved in polyP synthesis, we measured polyP production in  
114 mutants lacking each of the 11 bEBPs present in *E. coli* MG1655 (27) (Figs. 1B,C).  
115 Mutants lacking *glnG* (also known as *ntrC*)(28) had a significant defect in polyP  
116 production and mutants lacking *glnR* produced significantly more polyP than the wild-  
117 type (Fig. 1B). These phenotypes canceled each other out, and a  $\Delta glnR \Delta glnG$  double  
118 mutant produced an amount of polyP indistinguishable from the wild-type. No other  
119 bEBP mutations affected the extent of polyP synthesis under these conditions (Fig. 1C).

120

121 **RpoN-dependent regulation of polyP synthesis is dependent on cellular nitrogen**  
122 **status, but not on GlnB or GlnK per se.** The involvement of GlnG in polyP synthesis  
123 implicates the cellular response to nitrogen starvation in polyP regulation (28), which  
124 was not unexpected based on previous reports in the literature (16, 35). Under nitrogen  
125 limitation conditions, perceived by the cell as a decrease in the ratio of intracellular  
126 glutamine to glutamate and an accumulation of  $\alpha$ -ketoglutarate (28, 36, 37), glutamine

127 synthase (GlnA) is activated by a pathway involving the PII signaling proteins GlnB and  
128 GlnK (28, 38-41)(Fig. 2A). Transcription of *glnB* is constitutive, but *glnK* transcription is  
129 activated by RpoN and GlnG (28, 41, 42) (Fig. 2B), and *glnK* induction is a reliable  
130 reporter of cellular nitrogen starvation (41). Consistent with our previously-reported RNA  
131 sequencing data (22), polyP-inducing nutrient limitation strongly induced *glnK*  
132 expression (Fig. 2C). The gene encoding *glrR* is immediately adjacent to *glnB* in the *E.*  
133 *coli* genome, and the  $\Delta glrR$  mutation used here deletes not only most of the coding  
134 sequence of that gene (43), but also deletes a binding site for the repressor PurR in the  
135 *glnB* promoter region (44, 45) (Fig. 2B). We therefore hypothesized that GlnK or GlnB,  
136 which regulate the activity of a variety of proteins by direct interaction (28, 38, 46-48),  
137 might be activators of polyP synthesis. To test this idea, we expressed *glnB* and *glnK*  
138 from arabinose-inducible plasmids, but found that neither *glnB* nor *glnK* overexpression  
139 increased polyP production in wild-type,  $\Delta rpoN$ , or  $\Delta dksA$  mutant strains (Figs. 2D,E).  
140 Mutants lacking both *glnB* and *glnK* are glutamine auxotrophs (49), and LB, the rich  
141 medium used for the “before stress” growth condition (16), is naturally very low in  
142 glutamine (50), so we tested whether  $\Delta glnB$ ,  $\Delta glnK$ , or  $\Delta glnBK$  mutations affected polyP  
143 production after nutrient shift from rich media supplemented with glutamine (LBQ; Fig.  
144 2F). There was a very slight defect in polyP production in the  $\Delta glnB$  mutant, but the  
145 more surprising result was that, although the extent of polyP production after shift from  
146 LBQ into minimal medium was very similar to that after shift from LB (Figs. 2D,E,F),  
147 neither *rpoN* nor *glnG* mutants had any defect in polyP synthesis under these  
148 conditions. This was unexpected and showed that cellular nitrogen status affects the  
149 regulatory pathway by which polyP synthesis is activated. This observation probably

150 also explains the very high variability in polyP production we have previously reported in  
151 a  $\Delta glnG$  mutant (24) in experiments performed with a different supply of LB medium.  
152 This was not true for the  $\Delta dksA$  mutant (22, 24), which was defective in polyP synthesis  
153 regardless of whether the LB was supplemented with glutamine (Fig. 2F). Glutamine  
154 concentration is a common signal of cellular nitrogen status sensed by many regulators  
155 and enzymes (28, 37), so we tested whether PPK itself was allosterically regulated by  
156 either glutamate or glutamine, and found that neither of these compounds affected the  
157 activity of purified PPK *in vitro* at physiological concentrations (51) (Fig. 2G).

158  
159 **Effect of *glmY* and GlnS (glutamine--fructose-6-phosphate aminotransferase)**  
160 **regulation on polyP production.** Since we could not attribute the effect of the  $\Delta glrR$   
161 mutation on polyP synthesis (Fig. 1B) to dysregulation of *glnB* (Fig. 2D), we examined  
162 the possible role of the GlnR regulon on polyP synthesis. GlnR is activated by GlnK, a  
163 histidine kinase that responds to cell envelope disruptions (30). In *E. coli* MG1655, GlnR  
164 is only known to regulate the expression of two promoters, that of the operon encoding  
165 the alternative sigma factor RpoE and that of the sRNA *glmY* (31, 32) (Fig. 3A). We  
166 have previously reported that  $\Delta rpoE$  mutants have significant defects in polyP synthesis,  
167 indicating that RpoE is a positive regulator of polyP production (22). Regulation of the  
168 *rpoE* operon is complex (32, 52, 53), but GlnR is an activator of *rpoE* expression (32), so  
169 it is difficult to reconcile a model in which this explains the increase in polyP production  
170 in the  $\Delta glrR$  mutant (Fig. 1B). We therefore turned our attention to *glmY*, which, in a  
171 pathway involving the RNA-binding protein RapZ and the sRNA *glmZ*, is responsible for  
172 increasing GlnS (glutamine--fructose-6-phosphate aminotransferase) synthesis under



173 conditions where intracellular glucosamine-6-phosphate (GlcN6P) becomes limiting (29,  
174 31, 54)(Fig. 3A). GlcN6P, synthesized by GlmS from glutamine and fructose-6-  
175 phosphate, is an essential precursor of the peptidoglycan cell wall (55, 56), and so is  
176 linked to both cell envelope stress and cellular nitrogen status. Deletion of *phoP* or  
177 *phoQ*, encoding a two-component regulator that responds to environmental stresses,  
178 including low pH and magnesium limitation, and is known to also positively regulate  
179 *glmY* (33), also led to a significant increase in polyP synthesis (Fig. 3B), consistent with  
180 this being the mechanism by which the  $\Delta glrR$  mutation does so (Fig. 1B). PhoP is a  
181 global regulator that affects the expression and stability of many proteins (33), but is  
182 best known for its role in activating magnesium import (33, 57). High levels of polyP  
183 synthesis can cause magnesium starvation in *E. coli*, presumably by chelating the metal  
184 (23). However, deletion of the PhoP-regulated magnesium stress response genes *mgtA*  
185 and *mgtS* had no effect on polyP synthesis (Fig. 3B), and polyP-inducing nutrient shift  
186 did not activate the magnesium starvation response (Supplemental Fig. S1). PolyP-  
187 inducing nutrient limitation conditions did strongly downregulate *glmS* expression (Fig.  
188 3C). Neither fructose-6-phosphate nor GlcN6P affected the activity of PPK *in vitro* (Fig.  
189 3D).

190

191 **PolyP regulation by RapZ and GlmS depends on growth conditions.** Given the  
192 phenotypes of the  $\Delta glrR$  and  $\Delta phoP$  mutants (Figs. 1B, 3B), we hypothesized that  
193 deletion of *glmY* would increase the amount of polyP produced by *E. coli* and that either  
194 deletion of *rapZ* or *glmZ* or overexpression of *glmS* would decrease polyP production  
195 (Fig. 3A). However, under our normal nutrient limitation conditions, none of these had

196 any effect on polyP synthesis (Figs. 4A,B). We wondered whether this was due to  
197 inadequate expression of *glmS* from an arabinose-inducible promoter in minimal  
198 medium containing glucose (58), so performed a nutrient shift into minimal medium  
199 containing arabinose as a sole carbon source (Fig. 4C). Under these conditions, polyP  
200 accumulation in the vector-only control was approximately half of that seen after nutrient  
201 shift into glucose, but *glmS* expression did significantly reduce polyP production.  
202 Nutrient shift from glutamine-supplemented rich medium into minimal glucose medium  
203 also resulted in modest, but statistically significant, defects in polyP synthesis in a  $\Delta rapZ$   
204 mutant and upon *glmS* overexpression (Figs. 4D,E). Nutrient shift from LB into minimal  
205 medium with glucosamine as a sole carbon source, expected to result in very high  
206 levels of intracellular glucosamine and low GlmS activity (59-61), resulted in significantly  
207 less polyP production than shift into glucose, and shift into glycerol, expected to result in  
208 low intracellular glucosamine and therefore high GlmS activity (51, 60) resulted in no  
209 detectable polyP production at all (Fig. 4F). The extent of polyP production was not  
210 affected by supplementation of the rich medium with glucosamine (Supplemental Fig.  
211 S2). These results reinforce the observation that growth conditions impact not only the  
212 extent of polyP synthesis, but the pathways involved in its regulation, and indicate that  
213 regulators of GlmS can, under certain circumstances, impact polyP production, with a  
214 general correspondence between higher polyP levels when GlmS levels are low and  
215 *vice versa*, but can not fully explain the mechanism by which this occurs.

216

217 **PtsN positively regulates polyP synthesis regardless of its phosphorylation state**  
218 **or the presence of glutamine, but does not do so by interacting directly with PPK.**

219 The nitrogen phosphotransferase system (PTS<sup>Ntr</sup>) is a regulatory cascade that responds  
220 to nitrogen limitation and regulates the activity of multiple proteins in *Enterobacteriaceae*,  
221 including both GlnS and PhoP (62-67)(Fig. 5A). The genes encoding PtsN (also known  
222 as EIIA<sup>Ntr</sup>) and NPr, homologs of the EIIA and HPr proteins of the well-characterized  
223 carbon PTS (68), are encoded in the *rpoN* operon (34). PtsP (also known as EI<sup>Ntr</sup>),  
224 which is homologous to EI of the carbon PTS (34, 68), responds to both glutamine and  
225  $\alpha$ -ketoglutarate as signals of cellular nitrogen limitation by autophosphorylation (37, 69),  
226 ultimately resulting in phosphorylation of NPr and PtsN (70). Both NPr and PtsN interact  
227 with and regulate the activity of a variety of proteins, typically depending on their  
228 phosphorylation states (62-67). Based on these facts and our results showing roles for  
229 PhoP and GlnS in polyP regulation we hypothesized that the PTS<sup>NTr</sup> might form part of  
230 the link between nitrogen limitation and polyP synthesis.

231  
232 Mutants lacking *ptsN* were defective in polyP synthesis (Fig. 5B). However, this defect  
233 was not affected by glutamine supplementation and was not seen in  $\Delta npr$  or  $\Delta ptsP$   
234 mutants (Figs. 5B,C), suggesting that phosphorylation was not important for this  
235 phenotype. Indeed, both the non-phosphorylatable PtsN<sup>H73A</sup> variant and the  
236 phosphorylated form-mimicking PtsN<sup>H73E</sup> variant (71, 72) complemented the polyP  
237 defect of a  $\Delta ptsN$  mutant as well as did wild-type PtsN (Fig. 5D). PtsN regulates other  
238 proteins by direct physical interaction (62-67), so we used a bacterial two-hybrid assay  
239 (73) to test whether PtsN interacts with PPK *in vivo*, and found that it does not (Fig. 5E).  
240 PPK activity is also not affected by  $\alpha$ -ketoglutarate *in vitro* (Fig. 5F), eliminating this  
241 metabolite as a possible allosteric regulator of polyP production.

242

243 **Effect of polyP-inducing nutrient limitation on PtsN levels *in vivo*.** The only

244 reported example of a protein in *Enterobacteria* that interacts with both the

245 phosphorylated and dephosphorylated forms of PtsN is PhoP (33, 62). In *Salmonella*,

246 PtsN inhibits PhoP binding to DNA, and in turn, PhoP regulates the proteolytic

247 degradation of PtsN, leading to a decrease in PtsN protein concentration under PhoP-

248 activating conditions (Fig. 5A). Both abundance and phosphorylation of PtsN are

249 therefore potential variables in any PtsN-dependent regulatory system. PtsN abundance

250 in *Salmonella* is also regulated in response to carbon source availability (63). We

251 constructed strains encoding chromosomal fusions of the 3xFLAG epitope tag to the C-

252 terminus of PtsN (62) to allow us to determine whether our polyP-inducing stress

253 conditions led to changes in PtsN abundance in *E. coli*. In wild-type and  $\Delta phoP$  strains

254 (Figs. 6A,B), there was no significant change in PtsN abundance after nutrient limitation,

255 consistent with the apparent lack of PhoP induction under these conditions

256 (Supplemental Fig. S1). There was a significant increase in PtsN abundance two hours

257 after nutrient limitation in a  $\Delta rpoN$  mutant (Fig. 6C), but this increase did not correlate

258 with polyP accumulation, which is lower in this strain (Fig. 1A). Based on these results,

259 the regulation of polyP by PtsN does not appear to depend on PtsN abundance.

260

261 **PtsN acts downstream of RpoN, upstream of DksA, and independently of RpoE in**

262 **polyP regulation.** Finally, we used complementation analysis to examine the

263 relationships between the different regulators of polyP production we have identified.

264 PtsN, RpoN, DksA, and RpoE are all positive regulators of polyP production (Figs. 1,

265 5)(22, 24). Expressing RpoN from a plasmid does not increase polyP synthesis in a  
266  $\Delta ptsN$  mutant (Fig. 7A), but expressing either DksA or RpoE does (Fig. 7B). In contrast,  
267 expressing PtsN rescues polyP production in  $\Delta rpoN$  and  $\Delta rpoE$  mutants, but not in a  
268  $\Delta dksA$  mutant (Figs. 7C,D,E). This suggests a pathway in which, in response to nutrient  
269 limitation stress, RpoN positively regulates PtsN, which in turn positively regulates  
270 DksA, increasing polyP production. We do not, at this time, know which of these  
271 activation steps are direct and which are indirect or the mechanism by which DksA  
272 activates polyP production (22, 24). The case of RpoE is more complicated. Since the  
273 defects of  $\Delta rpoE$  and  $\Delta ptsN$  mutants can each be rescued by expression of the other  
274 gene (Figs. 7B,E), the simplest interpretation is that they regulate polyP production by  
275 independent mechanisms. However, *ptsN* is both a member of the RpoE regulon (74)  
276 and a multicopy suppressor of the conditionally lethal phenotype of a  $\Delta rpoE$  mutant  
277 (75), so these results must be interpreted cautiously. Expression of RpoN rescues the  
278 polyP defect of a  $\Delta rpoE$  mutant (22), DksA is a positive regulator of RpoE-dependent  
279 transcription for some genes (76), and there are known interactions between RpoN and  
280 RpoE in response to combined nitrogen and carbon starvation stress conditions (77).  
281 We think it is unlikely, therefore, that these regulators are operating completely  
282 independently in control of polyP production, but do not yet have enough data to  
283 speculate on their exact relationship.

284

## 285 **DISCUSSION**

286 It is perhaps unsurprising that the regulation of polyP synthesis is complex, given the  
287 ancient evolutionary roots of polyP (3, 6, 78, 79) and the intricacy of the regulatory

288 networks for other general stress response pathways in bacteria. In *E. coli*, for example,  
289 there are at least 20 regulators of the stress-responsive sigma factor RpoS known at  
290 time of writing, acting at the transcriptional, post-transcriptional, and post-translational  
291 levels (27, 80, 81). Envelope stress responses are equally complex and involve a  
292 variety of interacting and overlapping pathways and regulons, the details of which are  
293 still not fully understood (53, 82).

294

295 The experiments presented in this paper were intended to identify the gene or genes  
296 regulated by RpoN that contribute to polyP production (16, 22), and while we did  
297 successfully identify roles for the RpoN-related proteins GlnG, GlrR, and PtsN in  
298 modulating polyP production (Figs. 1, 5), we did not find a simple RpoN-dependent  
299 activator of polyP production and uncovered unexpected impacts of PhoPQ, RapZ, and  
300 GlmS (Figs. 3, 4). Some of these regulators only impacted polyP production under  
301 specific growth conditions. Adding glutamine to the rich media before nutrient limitation  
302 makes RpoN and GlnG unnecessary for polyP production (Fig. 2F), but makes RapZ  
303 and GlmS expression significant regulators (Fig. 4D,E). The carbon source in the  
304 minimal medium also affects both polyP production and the impact of GlmS expression  
305 on that production (Fig. 4C,F). Based on this, one important conclusion we can draw  
306 from our results is that, while shift from rich medium to minimal medium is in general a  
307 strong signal inducing polyP production (16, 24), the composition of both the rich and  
308 minimal media impacts not only the extent of polyP production, but also the pathways  
309 involved in regulating that production. This is not, in hindsight, completely surprising, but  
310 does mean that growth in LB medium (50) can not simply be considered a “non-stress”

311 condition that contrasts with “stressful” nutrient limitation, and that in order to fully  
312 understand polyP regulation we will also need to consider the cell’s physiological state  
313 under conditions when it is not producing detectable amounts of polyP.

314  
315 The exact function of the PTS<sup>Ntr</sup> has been debated for some time (28, 34), but it is clear  
316 from our results that PtsN has a phosphorylation-independent positive effect on polyP  
317 synthesis (Figs. 5, 7). What is less clear is how this occurs. PtsN does not appear to  
318 interact directly with PPK *in vivo* (Fig. 5E). Overexpression of PtsN is known to  
319 generally reduce cell envelope stress in *E. coli*, although the mechanism by which it  
320 does so is not well understood (75). Known targets of PtsN regulation include proteins  
321 involved in phosphate transport (83), potassium transport (84-86), GlcN6P synthesis  
322 (64), and environmental sensing (62). While phosphate transport is certainly important  
323 for polyP synthesis (16, 19, 87, 88) and PtsN-dependent changes in potassium levels  
324 are known to impact sigma factor specificity (85), which may also play a role in polyP  
325 regulation (22), both of these phenotypes are dependent on the phosphorylation state of  
326 PtsN, as is the interaction between PtsN and GlnS (64). While this manuscript was in  
327 preparation, Gravina *et al.* (89) reported the identification of multiple new PtsN  
328 interaction candidates in *E. coli*, most of which also appear to be phosphorylation-state  
329 specific. Fortuitously, we have already tested many of these for potential roles in polyP  
330 accumulation (22), including proteins involved in flagellar motility and glycerol  
331 metabolism, and found that those pathways have minimal effects on polyP  
332 accumulation. However, there are additional candidates, including proteins of unknown

333 function (e.g. YeaG, YcgR, and YcjN) and enzymes of central metabolism (e.g. AceAB,  
334 PpsA, SucC), that remain to be tested.  
335  
336 Nevertheless, with the information in hand, we identified the interaction between PtsN  
337 and the transcription factor PhoP (62) as the most likely candidate for a  
338 phosphorylation-independent mechanism for PtsN's effect on polyP accumulation. PhoP  
339 is a global regulator that responds to magnesium limitation, low pH, antimicrobial  
340 peptides, hyperosmotic stress, periplasmic redox state, and other environmental  
341 conditions (33). PtsN inhibits PhoP's DNA binding affinity, thereby potentially impacting  
342 transcription of the PhoP regulon and of genes controlled by regulators that are part of  
343 that regulon (e.g. RstA, MgrR, or IraM)(33, 62, 90). However, PhoP also has large-scale  
344 post-translational effects on the proteome by regulating the activity of proteases (33, 91,  
345 92), and PtsN is degraded by the Lon protease under PhoP-activating conditions in a  
346 PhoP-dependent feedback loop (62). While PtsN abundance was not regulated in  
347 response to nutrient limitation in wild-type or  $\Delta phoP$  strains (Figs. 6A,B), PtsN  
348 abundance did increase at late time points in a  $\Delta rpoN$  mutant (Fig. 6C). It is tempting to  
349 speculate that this mutant was upregulating PtsN in an attempt to compensate for the  
350 loss of RpoN (Fig. 7C), but additional experiments will be needed to test this hypothesis.  
351 The increase in polyP production in *phoPQ* mutants (Fig. 3B) is consistent with the  
352 hypothesis that PtsN acts in concert with PhoP to regulate polyP production, but it is  
353 also possible that there is another PtsN interaction partner involved. Which member(s)  
354 of the PhoP regulon besides PtsN might affect polyP production is also unknown.  
355



356 It is important to note that none of the regulators we identified in this paper are  
357 absolutely required for induction of polyP synthesis after stress. Some impact polyP  
358 production positively (PtsN, GlnG) and some negatively (GlrR, PhoPQ), but every  
359 mutant we tested was still able to respond to nutrient limitation stress by increasing  
360 polyP production to some extent. This probably indicates that there are redundant  
361 mechanisms by which stress signals impact PPK and PPX activity. We know this to be  
362 the case for PPX, which is inhibited by both (p)ppGpp and hypochlorous acid-driven  
363 oxidation (17, 20). The mechanism(s) by which PPK activity is controlled remain  
364 unknown, although the stress-responsive accumulation of polyP in  $\Delta ppx$  mutant strains  
365 indicates that such a mechanism must exist (17, 24). Our *in vitro* results (Figs. 2G, 3D,  
366 5F) do show that PPK itself is not allosterically regulated by a set of common  
367 metabolites whose levels change under nitrogen limitation conditions (28, 37).

368  
369 What is clear from our results (Figs. 1, 3, 4, 5) is that multiple pathways that influence  
370 cell envelope stress or synthesis impact polyP synthesis in *E. coli*. Without knowing the  
371 mechanism by which PPK activity itself is modulated, it is difficult to determine whether  
372 these pathways directly regulate polyP synthesis or, alternatively, whether polyP  
373 synthesis responds to the changes in cell envelope homeostasis that result from  
374 disruption of those regulatory networks (28-30, 32, 33). Based on the data in this and  
375 our previous papers (17, 22-24), on balance, we favor the second hypothesis, but are  
376 working to clarify this question. PPK is a peripheral membrane protein (93), so it is not  
377 impossible that PPK itself is sensitive to changes in the cytoplasmic membrane *in vivo*.  
378 If this is the case, it will be difficult to recapitulate PPK regulation *in vitro*. Regardless,

379 our results illustrate previously unknown connections among a variety of well-conserved  
380 environmental stress response pathways and show that even as well-studied an  
381 organism as *E. coli* still has plenty of capacity to surprise us and confound our  
382 expectations.

383

## 384 **MATERIALS AND METHODS**

### 385 **Bacterial strains, growth conditions, and molecular methods**

386 All strains and plasmids used in this study are listed in Table 1. We carried out DNA  
387 manipulations by standard methods (94, 95) in the *E. coli* cloning strain DH5 $\alpha$   
388 (Invitrogen) and grew *E. coli* at 37°C in Lysogeny Broth (LB)(96) containing 5 g l<sup>-1</sup> NaCl  
389 and, where indicated, 5 mM *L*-glutamine (LBQ) or 4 g l<sup>-1</sup> glucosamine (LBGlcN). We  
390 prepared fresh glutamine and glucosamine stock solutions each day. We added  
391 antibiotics when appropriate: ampicillin (100  $\mu$ g ml<sup>-1</sup>), chloramphenicol (17 or 35  $\mu$ g ml<sup>-1</sup>),  
392 gentamycin (30  $\mu$ g ml<sup>-1</sup>), kanamycin (25 or 50  $\mu$ g ml<sup>-1</sup>), or spectinomycin (50  $\mu$ g ml<sup>-1</sup>).  
393 We constructed, maintained, and tested all *rpoE* mutant strains in media containing 10  
394  $\mu$ g ml<sup>-1</sup> erythromycin (97).

395

### 396 **Databases and primer design**

397 We obtained information about *E. coli* genes, proteins, and regulatory networks from the  
398 Integrated Microbial Genomes database (98), EcoCyc (27), and RegulonDB (45). We  
399 designed PCR and sequencing primers with Web Primer ([www.candidagenome.org/cgi-](http://www.candidagenome.org/cgi-bin/compute/web-primer)  
400 [bin/compute/web-primer](http://www.candidagenome.org/cgi-bin/compute/web-primer)) or SnapGene version 5.3.2 (Insightful Science), and  
401 mutagenic primers with PrimerX ([www.bioinformatics.org/primerx/index.htm](http://www.bioinformatics.org/primerx/index.htm)). We

402 designed all primers used for qPCR with Primer Quest (www.idtdna.com; parameter set  
403 “qPCR 2 primers intercalating dyes” for qRT-PCR primer design) and confirmed  
404 specificity and amplification efficiencies for each primer pair of close to 1. These primers  
405 are listed in Table 2.

406

## 407 **Strain construction**

408 Unless otherwise indicated, all *E. coli* strains were derivatives of wild-type strain  
409 MG1655 (F<sup>-</sup>, *rph-1 ilvG<sup>-</sup> rfb-50*)(99), and we confirmed all chromosomal mutations by  
410 PCR.

411

412 We used P1<sub>vir</sub> transduction (24, 100) to move gene knockout alleles from the Keio  
413 collection (43) into MG1655, generating strains MJG1480 ( $\Delta phoP790::kan^+$ ), MJG1483  
414 ( $\Delta mgfA789::kan^+$ ), MJG1484 ( $\Delta phoQ789::kan^+$ ), MJG1955 ( $\Delta glrR728::kan^+$ ), MJG1956  
415 ( $\Delta atoC774::kan^+$ ), MJG1969 ( $\Delta hyfR739::kan^+$ ), MJG1970 ( $\Delta pspF739::kan^+$ ), MJG1971  
416 ( $\Delta norR784::kan^+$ ), MJG1972 ( $\Delta ygeV720::kan^+$ ), MJG1973 ( $\Delta rtcR755::kan^+$ ), MJG1974  
417 ( $\Delta prpR772::kan^+$ ), MJG1975 ( $\Delta zraR775::kan^+$ ), MJG1976 ( $\Delta fhIA735::kan^+$ ), MJG2058  
418 ( $\Delta glnB727::kan^+$ ), MJG2061 ( $\Delta glnK736::kan^+$ ), MJG2064 ( $\Delta glnG730::kan^+$ ), MJG2086  
419 ( $\Delta ptsN732::kan^+$ ), MJG2090 ( $\Delta npr-734::kan^+$ ), MJG2091 ( $\Delta ptsP753::kan^+$ ), and  
420 MJG2112 ( $\Delta rapZ733::kan^+$ ). We resolved the insertions (101) in MJG1480, MJG1955,  
421 MJG2058, MJG2086, and MJG2112 to give strains MJG1501 ( $\Delta phoP790$ ), MJG2065  
422 ( $\Delta glrR728$ ), MJG2082 ( $\Delta glnB727$ ), MJG2089 ( $\Delta ptsN732$ ), and MJG2114 ( $\Delta rapZ733$ ),  
423 then transduced MJG2065 and MJG2082 with  $\Delta glnG730::kan^+$  and  $\Delta glnK736::kan^+$ ,  
424 respectively, to yield strains MJG2068 ( $\Delta glrR728 \Delta glnG730::kan^+$ ) and MJG2083

425 ( $\Delta glnB727 \Delta glnK736::kan^+$ ). Strains lacking both *glnB* and *glnK* are glutamine  
426 auxotrophs (39) and were constructed and maintained on LBQ.

427

428 We replaced the *mgtS*, *glmZ*, and *glmY* genes of strain MG1655 with pKD3-derived  
429 chloramphenicol resistance cassettes by recombineering (101), using primers 5' AAT  
430 TAA GGT AAG CGA GGA AAC ACA CCA CAC CAT AAA CGG AGG CAA ATA ATG  
431 GTG TAG GCT GGA GCT GCT TC 3' and 5' ACA CAA CTG TAA CAA GGG GCC  
432 GGT TAG GTG AGG GAT TAT CTC CGT TCA TTA CAT ATG AAT ATC CTC CTT AG  
433 3', 5' AAG TGT TAA GGG ATG TTA TTT CCC GAT TCT CTG TGG CAT AAT AAA  
434 CGA GTA GTG TAG GCT GGA GCT GCT TC 3' and 5' CTT CCT GAT ACA TAA AAA  
435 AAC GCC TGC TCT TAT TAC GGA GCA GGC GTT AAA CAT ATG AAT ATC CTC  
436 CTT AG 3', or 5' TTA CCA AAC TAT TTT CTT TAT TGG CAC AGT TAC TGC ATA  
437 ATA GTA ACC AGT GTG TAG GCT GGA GCT GCT TC 3' and 5' TCG TCA GAC GCG  
438 AAT AGC CTG ATG CTA ACC GAG GGG AAG TTC AGA TAC AAC CAT ATG AAT  
439 ATC CTC CTT AG 3', to yield strains MJG1479 ( $\Delta mgtS1000::cat^+$ ), MJG2151  
440 ( $\Delta glmZ1000::cat^+$ ), and MJG2155 ( $\Delta glmY1000::cat^+$ ).

441

442 We fused a 3xFLAG tag to the C-terminus of the chromosomal *ptsN* gene by  
443 recombineering (102). We amplified the 3xFLAG sequence and kanamycin resistance  
444 cassette from plasmid pSUB11 (102) with primers 5' GAA GAG CTG TAT CAA ATC  
445 ATT ACG GAT ACC GAA GGT ACT CCG GAT GAA GCG GAC TAC AAA GAC CAT  
446 GAC GG 3' and 5' TAC CAT GTA CTG TTT CTC CTC ACA ACG TCT AAA AGA GAC  
447 ATT ACC GAA TAA CAT ATG AAT ATC CTC CTT AG 3' and electroporated the

448 resulting PCR product into MG1655 expressing  $\lambda$  Red recombinase from plasmid  
449 pKD46 (101), generating strain MJG2179 (*ptsN*-3xFLAG *kan*<sup>+</sup>). We then resolved the  
450 kanamycin resistance cassette in MJG2179 with plasmid pCP20 (101) to yield strain  
451 MJG2191 (*ptsN*-3xFLAG). We used P1vir transduction (24, 100) to move the  
452  $\Delta$ *phoP790::kan*<sup>+</sup> allele from the Keio collection (43) into MJG2191, generating strain  
453 MJG2193 (*ptsN*-3xFLAG  $\Delta$ *phoP790::kan*<sup>+</sup>) We amplified the  $\Delta$ *rpoN730::kan*<sup>+</sup> allele from  
454 strain MJG1763 with primers 5' TAC AAG ACG AAC ACG TTA 3' and 5' TTT GGC AAA  
455 TTT GGC TGT 3' and used recombineering (101) to insert this locus into strain  
456 MJG2191, generating strain MJG2200 ( $\Delta$ *rpoN730::kan*<sup>+</sup> *ptsN*-3xFLAG), which we then  
457 resolved (101) to generate strain MJG2202 ( $\Delta$ *rpoN730 ptsN*-3xFLAG).

458

#### 459 **Plasmid construction**

460 Plasmid pRpoN was a gift from Dr. Joseph Wade (NY State Department of  
461 Health)(103). We amplified the *glnK* CDS (339 bp) plus 20 bp of upstream sequence  
462 from *E. coli* MG1655 genomic DNA with primers 5' TTC GAA TTC ATT CTG ACC GGA  
463 GGG GAT CTA T 3' and 5' CTT AAG CTT TTA CAG CGC CGC TTC GTC 3' and  
464 cloned it into the *Eco*RI and *Hind*III sites of plasmid pBAD18 (58) to generate plasmid  
465 pGLNK1. We amplified the *glnB* CDS (339 bp) plus 11 bp of upstream sequence and  
466 the *glnS* CDS (1830 bp) plus 25 bp of upstream sequence from *E. coli* MG1655  
467 genomic DNA with primers 5' TTT GGG CTA GCG AAT TCC AAG GAA TAG CAT GAA  
468 AAA GAT TGA 3' and 5' CAA AAC AGC CAA GCT TTT AAA TTG CCG CGT CGT C 3'  
469 or 5' TTT GGG CTA GCG AAT TCA CGA TAT AAA TCG GAA TCA AAA ACT ATG 3'  
470 and 5' CAA AAC AGC CAA GCT TTT ACT CAA CCG TAA CCG ATT TTG C 3' and

471 then inserted each gene between the *EcoRI* and *HindIII* sites of plasmid pBAD18  
472 (amplified with primers 5' AAG CTT GGC TGT TTT GGC 3' and 5' GAA TTC GCT AGC  
473 CCA AAA AAA C 3') by *in vivo* assembly cloning (104) to generate plasmids pGLNB1  
474 and pGLMS1, respectively. Plasmid pPPK33, encoding PPK with a C-terminal  
475 GAAEPEA peptide tag for affinity purification (105) between the *NdeI* and *HindIII* sites  
476 of plasmid pET-21b(+)(Novagen), was synthesized by GenScript.

477  
478 We amplified the *gfpmut3* CDS (717 bp) (106) with primers 5' TTG AAG GCT CTC AAG  
479 GAT GAG TAA AGG AGA AGA ACT TTT CAC TGG 3' and 5' CAG GGC AGG GTC  
480 GTT TTA TTT GTA TAG TTC ATC CAT GCC ATG TG 3', the *aadA*<sup>+</sup> gene and origin of  
481 replication of pCDFDuet-1 (Novagen) with primers 5' AAC GAC CCT GCC CTG AAC C  
482 3' and 5' CCT TGA GAG CCT TCA ACC CAG T 3', and joined the resulting products by  
483 *in vivo* assembly (104), yielding plasmid pGFP3. We amplified the *mgtS* promoter (200  
484 bp) from MG1655 genomic DNA with primers 5' GGT TGA AGG CTC TCA AGG TGA  
485 TCA TTG CTG CGT GGG TGC TGA 3' and 5' AAG TTC TTC TCC TTT ACT CAT TAT  
486 TTG CCT CCG TTT ATG GTG TGG TGT G 3', pGFP3 with primers 5' ATG AGT AAA  
487 GGA GAA GAA CTT TTC ACT GGA G 3' and 5' CCT TGA GAG CCT TCA ACC CAG  
488 TC 3', and joined the resulting products by *in vivo* assembly (104), yielding plasmid  
489 pGFP4.

490  
491 We amplified the *ptsN* CDS (492 bp) plus 20 bp of upstream sequence from *E. coli*  
492 MG1655 genomic DNA with primers 5' CTC TCT ACT GTT TCT CCA TAC CCG TTT  
493 TTT TGG GCT AGC GGC AGG TTC TTA GGT GAA ATT ATG ACA AAT AAT GAT

494 ACA 3' and 5' TAT CAG GCT GAA AAT CTT CTC TCA TCC GCC AAA ACA GCC ACT  
495 ACG CTT CAT CCG GAG TAC CT 3' and inserted it between the *EcoRI* and *HindIII*  
496 sites of plasmid pBAD18 by *in vivo* assembly cloning (104) to generate plasmid  
497 pPTSN1. We used single primer site-directed mutagenesis (107) to mutate pPTSN1  
498 with primers 5' CAA TGG TAT TGC CAT TCC GGA AGG CAA ACT GGA AGA AGA  
499 TAC 3' or 5' GGT ATT GCC ATT CCG GCG GGC AAA CTG GAA GAA G 3'. This  
500 yielded pPTSN2, containing a *ptsN*<sup>C217G, T219A</sup> allele (encoding PtsN<sup>H73E</sup>), and pPTSN3,  
501 containing a *ptsN*<sup>C217G, A218C, T219G</sup> allele (encoding PtsN<sup>H73A</sup>).  
502  
503 We amplified the dimerizing leucine zipper domain of GCN4 (105 bp) from  
504 *Saccharomyces cerevisiae* genomic DNA with primers 5' TCC GGA TCC CTT GCA  
505 AAG AAT GAA ACA ACT TGA AG 3' and 5' ACC GGT ACC CGG CGT TCG CCA ACT  
506 AAT TTC T 3' and cloned it into the *BamHI* and *KpnI* sites of plasmid pKT25 (73) to  
507 yield plasmid pGCN4zip1 and into the *BamHI* and *KpnI* sites of plasmid pUT18 (73) to  
508 yield plasmid pGCN4zip3. We amplified the *ppk* CDS with no stop codon (2084 bp) from  
509 *E. coli* MG1655 genomic DNA with primers 5' CAG CTG CAG GGA TGG GTC AGG  
510 AAA AGC TAT ACA TCG 3' and 5' TCC GGA TCC TCT TCA GGT TGT TCG AGT GAT  
511 TTG 3' and cloned it into the *PstI* and *BamHI* sites of plasmid pKNT25 (73) to yield  
512 plasmid pPPK12 or into the *PstI* and *BamHI* sites of plasmid pKT25 (73) to yield  
513 plasmid pPPK13. We amplified the *ptsN* CDS (493 bp) from plasmid pPTSN1 with  
514 primers 5' CAC TGC AGG ATG ACA AAT AAT GAT ACA ACT CTA CAG CTT A 3' and  
515 5' TGA ATT CGA CTA CGC TTC ATC CGG AGT AC 3', amplified pUT18C (73) with  
516 primers 5' GAA GCG TAG TCG AAT TCA TCG ATA TAA CTA AGT AAT ATG GTG 3'

517 and 5' TAT TTG TCA TCC TGC AGT GGC GTT CCA C 3', and joined the resulting  
518 products by *in vivo* assembly (104), yielding plasmid pPTSN5.

519

### 520 ***In vivo* polyphosphate assay**

521 We extracted and quantified polyP from bacterial cultures as previously described (108).

522 To induce polyP synthesis by nutrient limitation (16, 22), we grew *E. coli* strains in 10 ml

523 rich medium (LB, LBQ, or LBGlcN) at 37°C with shaking (200 rpm) to  $A_{600}=0.2-0.4$ , then

524 harvested 1 ml samples by centrifugation, resuspended them in 250  $\mu$ l of 4 M guanidine

525 isothiocyanate, 50 mM Tris-HCl (pH 7), lysed by incubation for 10 min at 95°C, then

526 immediately froze at -80°C. We also harvested 5 ml of each LB culture by centrifugation

527 (5 min at 4,696 g at room temperature), rinsed once with 5 ml phosphate-buffered saline

528 (PBS), then re-centrifuged and resuspended in 5 ml MOPS minimal medium

529 (Teknova)(109) containing 0.1 mM  $K_2HPO_4$ , and 0.1 mM uracil and 4 g l<sup>-1</sup> glucose (24).

530 Where indicated, we replaced the glucose with 4 g l<sup>-1</sup> arabinose, 4 g l<sup>-1</sup> glucosamine, or

531 8 g l<sup>-1</sup> glycerol. We incubated these cultures for 2 hours at 37°C with shaking, then

532 collected additional samples as described above. For experiments involving arabinose-

533 inducible plasmids, we added arabinose (2 g l<sup>-1</sup>) to both the rich and minimal media. We

534 determined the protein concentrations of thawed samples by Bradford assay (Bio-Rad)

535 of 5  $\mu$ l aliquots, then mixed with 250  $\mu$ l of 95% ethanol, applied to an EconoSpin silica

536 spin column (Epoch Life Science), rinsed with 750  $\mu$ l 5 mM Tris-HCl, pH 7.5, 50 mM

537 NaCl, 5 mM EDTA, 50% ethanol, then eluted with 150  $\mu$ l 50 mM Tris-HCl, pH 8. We

538 brought the eluate to 20 mM Tris-HCl, pH 7.5, 5 mM  $MgCl_2$ , 50 mM ammonium acetate

539 with 1  $\mu$ g of *Saccharomyces cerevisiae* exopolyphosphatase PPX1 (110) in a final



540 volume of 200  $\mu$ l, incubated for 15 min at 37°C, then measured the resulting polyP-  
541 derived orthophosphate using a colorimetric assay (111) and normalized to total protein  
542 content. For all figures, we report polyP concentrations in terms of individual phosphate  
543 monomers.

544

### 545 **Quantitative RT-PCR**

546 At the indicated time points after nutrient limitation, we harvested 1 ml of cells by  
547 centrifugation and resuspended in *RNAlater* (ThermoFisher) for storage at -20°C. We  
548 extracted RNA using the RiboPure™ RNA Purification Kit for bacteria (Ambion)  
549 following the manufacturer's instructions, including DNase treatment to remove  
550 contaminating genomic DNA, then used the SuperScript™ IV VILLO™ kit (ThermoFisher)  
551 to reverse transcribe cDNA from mRNA, following the manufacturer's instructions and  
552 including a no-RT control for each reaction. We calculated changes in gene expression  
553 using the  $2^{-\Delta\Delta C_t}$  method (112), using *yqfB*, whose expression does not change under  
554 these polyP induction conditions (22), as an internal expression control.

555

### 556 **PPK overexpression and purification**

557 C-tagged PPK was overexpressed and purified by a modification of a previously  
558 published protocol (17). 50-ml overnight cultures of BL21(DE3) containing pPPK33 were  
559 subcultured into 1 l of Protein Expression Media (PEM; 12 g l<sup>-1</sup> tryptone, 24 g l<sup>-1</sup> yeast  
560 extract, 4% v/v glycerol, 2.314 g l<sup>-1</sup> KH<sub>2</sub>PO<sub>4</sub>, 12.54 g l<sup>-1</sup> K<sub>2</sub>HPO<sub>4</sub>) supplemented with 10  
561 mM MgCl<sub>2</sub> and 100  $\mu$ g ml<sup>-1</sup> ampicillin. The culture was grown at 37°C with shaking until  
562 the  $A_{600} = 0.8$ , then shifted to 20°C and cooled for 1 hour. Following the cool-down

563 period, PPK expression was induced by the addition of 150  $\mu$ M isopropyl  $\beta$ -D-1-  
564 thiogalactopyranoside (IPTG). Overexpression was allowed to proceed overnight at  
565 20°C with shaking. The overexpression culture was pelleted at 6000 g, resuspended in  
566 100 ml of Buffer A (50 mM Tris-HCl pH 7.5, 10% w/v sucrose) with 300  $\mu$ g ml<sup>-1</sup>  
567 lysozyme, and incubated on ice for 45 min. The digest was pelleted at 16,000 x g for 10  
568 minutes, then the pellet was resuspended in 50 ml of Buffer B (Buffer A + 5 mM MgCl<sub>2</sub> +  
569 30 U ml<sup>-1</sup> Pierce Universal Nuclease + 1 Pierce Protease Inhibitor cocktail tablet) and  
570 lysed by sonication (5 s on, 5 s off for 5 min at 50% amplitude). The sonicated lysate  
571 was pelleted at 20,000 g for 1 hour at 4°C, and the pellet was resuspended in 25 ml of  
572 C-tag Binding Buffer (20 mM Tris-HCl pH 7.4) plus solid KCl to 1 M final concentration.  
573 1 M Na<sub>2</sub>CO<sub>3</sub> was added at a 1:10 dilution to the resuspension, and the salt extraction  
574 was incubated at 4°C for 30 min with stirring. Following incubation, the solution was  
575 sonicated in 5 s pulses for 2 min, then pelleted at 20,000 g for 1 hour at 4°C. The  
576 supernatant was diluted 1:1 with cold H<sub>2</sub>O and loaded onto a C-tag Affinity Column  
577 (ThermoFisher) equilibrated with C-tag Binding Buffer. The column was washed with 10  
578 column volumes of C-tag Binding Buffer and PPK was eluted with a gradient of 0-100%  
579 C-tag Elution Buffer (20 mM Tris-HCl pH 7.4, 2 M MgCl<sub>2</sub>) with an ÄKTA™ Start FPLC  
580 (Cytiva Life Sciences). Fractions containing pure PPK were pooled and dialyzed against  
581 PPK Storage Buffer (20 mM HEPES-KOH pH 8.0, 150 mM NaCl, 15% glycerol, 1 mM  
582 EDTA) at 4°C and stored at -80°C.

583

584 ***In vitro* assay of PPK activity**

585 We determined the specific activity for polyP synthesis by PPK as previously described  
586 (23). Reactions (125  $\mu$ l total volume) contained 5 nM PPK, 50 mM HEPES-KOH (pH  
587 7.5), 50 mM ammonium sulfate, 5 mM MgCl<sub>2</sub>, 20 mM creatine phosphate, and 60  $\mu$ g ml<sup>-1</sup>  
588 creatine kinase. Where indicated, reactions also contained 100 mM L-glutamate (pH  
589 7.5), 10 mM L-glutamine (pH 7.5), 1 mM fructose-6-phosphate, 1 mM glucosamine-6-  
590 phosphate, or 5 or 10 mM  $\alpha$ -ketoglutarate (pH 7.5), concentrations chosen to represent  
591 the high end of the physiological range for each compound in *E. coli* (51). We  
592 prewarmed reactions to 37°C, then started them by addition of MgATP to a final  
593 concentration of 6 mM. We removed aliquots (20  $\mu$ l) at 1, 2, 3, and 4 minutes and  
594 diluted them into 80  $\mu$ l of a stop solution containing 62.5 mM EDTA and 50  $\mu$ M DAPI  
595 (4',6-diamidino-2-phenylindole) in black 96-well plates, then measured steady-state  
596 polyP-DAPI fluorescence of these samples (ex. 415 nm, em. 600 nm) (15) in an Infinite  
597 M1000 Pro microplate reader (Tecan Group, Ltd.). We determined the polyP content of  
598 each sample (calculated in terms of individual phosphate monomers) by comparison to  
599 a standard curve of commercially available polyP (Acros Organics) (0 - 150  $\mu$ M)  
600 prepared in the buffer described above containing 6 mM MgATP and calculated rates of  
601 polyP synthesis by linear regression (Prism 9, GraphPad Software, Inc.).

602

### 603 **Bacterial two-hybrid protein interaction assay**

604 We assessed protein interactions *in vivo* using the BACTH procedure (73). Briefly, we  
605 grew derivatives of *E. coli cya* strain BTH101 containing plasmids expressing fusions of  
606 proteins of interest to the T18 or T25 complementary fragments of *Bordetella pertussis*  
607 adenylate cyclase overnight in LB and then evaluated  $\beta$ -galactosidase activity of these

608 strains either by spotting overnight cultures on LB plates containing ampicillin,  
609 kanamycin, 0.5 mM IPTG, and 40  $\mu\text{g ml}^{-1}$  5-bromo-4-chloro-3-indolyl- $\beta$ -D-  
610 galactopyranoside (X-Gal) and incubating for 2 days at 30°C or, for quantitative  
611 measurements, using a single-step assay (113): after 24 h of growth at 37°C in LB broth  
612 containing ampicillin, kanamycin, and 0.5 mM IPTG we harvested 80  $\mu\text{L}$  of cells by  
613 centrifugation, resuspended them in 200  $\mu\text{L}$  of 60 mM  $\text{Na}_2\text{HPO}_4$ , 40 mM  $\text{NaH}_2\text{PO}_4$ , 10  
614 mM KCl, 1 mM  $\text{MgSO}_4$ , 36 mM  $\beta$ -mercaptoethanol, 1.1  $\text{mg ml}^{-1}$  *ortho*-nitrophenyl- $\beta$ -  
615 galactoside (ONPG), 1.25  $\text{mg ml}^{-1}$  lysozyme and 6.7% PopCulture reagent (Novagen) in  
616 a 96-well plate, and then measured  $A_{600}$  and  $A_{420}$  over time at 24°C in a Tecan M1000  
617 Infinite plate reader. We calculated Miller Units according to the formula ( $1000 \times (A_{420} /$   
618  $\text{min}) / (\text{initial } A_{600} \times \text{culture volume (ml)})$ ).

619

## 620 **Quantitative Western blotting**

621 *E. coli* strains with chromosomal *ptsN*-3xFLAG fusions were grown and stressed by  
622 nutrient limitation as described above. At the indicated time points, 1-ml aliquots were  
623 harvested by centrifugation and resuspended in 100  $\mu\text{l}$  of 50 mM Tris-HCl (pH 8), 150  
624 mM NaCl, 1% Triton X-100 containing 1X HALT protease inhibitor cocktail  
625 (ThermoFisher), then incubated at 95°C for 10 min to lyse the cells. Lysates were stored  
626 at -80°C until use. Aliquots of each sample were thawed on ice, mixed 1:1 with fresh  
627 lysis buffer, then mixed 4:1 with reducing loading dye (250 mM Tris-HCl pH 6.8, 10%  
628 SDS, 0.008% bromophenol blue, 40% glycerol, 2.8 M  $\beta$ -mercaptoethanol). Western  
629 blots were prepared and analyzed as described previously (114, 115) with few  
630 exceptions. Briefly, lysate samples were loaded on an AnykDa Stain-Free SDS-PAGE

631 gel (BioRad Cat #4568126) and run until the dye front neared the bottom of the gel.  
632 Gels were then transferred to a PVDF membrane (BioRad Cat # 1620174) using a  
633 TurboBlot semi-dry transfer system, then blocked in StartingBlock T20 TBS blocking  
634 buffer (Thermo Cat #37543) overnight. Blots were blocked for 30 min at room  
635 temperature, then incubated in a 1:25,000 dilution of rabbit anti-RecA antibody (Abcam  
636 Cat #ab63797) in the blocking buffer for one hour at room temperature. Blots were  
637 washed in three times in TBST, then incubated 1 hour at room temperature in blocking  
638 buffer containing a 1:10,000 dilution of goat anti-Rabbit IgG H+L HRP-conjugated  
639 (Abcam Cat #ab63797). Blots were washed again in 3X TBS-T then incubated in  
640 blocking buffer containing a 1:5000 dilution of rabbit Anti-DDDDK HRP conjugated  
641 antibody (Abcam Cat #ab2493). Blots were washed three times with TBST and once  
642 with TBS, then developed using the BioRad Clarity ECL Substrate kit (Cat # 1705061)  
643 and imaged on a BioRad Gel Doc. Images were analyzed in ImageJ (116) by taking  
644 same-area measurements of each RecA band or PtsN band, blank correcting the mean  
645 gray values (signal) using same-area measurements matched to the respective band,  
646 and normalizing the PtsN signal to RecA signal.

647

## 648 **Statistical analyses**

649 We used GraphPad Prism version 9.2 (GraphPad Software) to perform statistical  
650 analyses, including two-way repeated measures ANOVA with Holm-Sidak's multiple  
651 comparison tests. Repeated measures ANOVA cannot handle missing values, so we  
652 analyzed data sets with samples having different  $n$  numbers (e.g. Fig. 1C) with an

653 equivalent mixed model which uses a compound symmetry covariance matrix and is fit  
654 using Restricted Maximum Likelihood (REML) (without Geisser-Greenhouse correction).

655

#### 656 **Data availability**

657 All strains and plasmids generated in the course of this work are available from the  
658 authors upon request.

659

#### 660 **ACKNOWLEDGEMENTS**

661 This project was supported by NIH grant R35GM124590.

662

#### 663 **REFERENCES**

- 664 1. Denoncourt A, Downey M. 2021. Model systems for studying polyphosphate  
665 biology: a focus on microorganisms. *Curr Genet* doi:10.1007/s00294-020-01148-  
666 x.
- 667 2. Desfougeres Y, Saiardi A, Azevedo C. 2020. Inorganic polyphosphate in  
668 mammals: where's Wally? *Biochem Soc Trans* 48:95-101.
- 669 3. Albi T, Serrano A. 2016. Inorganic polyphosphate in the microbial world.  
670 Emerging roles for a multifaceted biopolymer. *World J Microbiol Biotechnol*  
671 32:27.
- 672 4. Gautam LK, Sharma P, Capalash N. 2019. Bacterial Polyphosphate Kinases  
673 Revisited: Role in Pathogenesis and Therapeutic Potential. *Curr Drug Targets*  
674 20:292-301.

- 675 5. Rao NN, Gomez-Garcia MR, Kornberg A. 2009. Inorganic polyphosphate:  
676 essential for growth and survival. *Annu Rev Biochem* 78:605-47.
- 677 6. Gray MJ, Jakob U. 2015. Oxidative stress protection by polyphosphate--new  
678 roles for an old player. *Curr Opin Microbiol* 24:1-6.
- 679 7. Bowlin MQ, Gray MJ. 2021. Inorganic Polyphosphate in Host and Microbe  
680 Biology. *Trends Microbiol* doi:10.1016/j.tim.2021.02.002:S0966-842X(21)00036-  
681 6.
- 682 8. Suess PM, Chinea LE, Pilling D, Gomer RH. 2019. Extracellular Polyphosphate  
683 Promotes Macrophage and Fibrocyte Differentiation, Inhibits Leukocyte  
684 Proliferation, and Acts as a Chemotactic Agent for Neutrophils. *J Immunol*  
685 203:493-499.
- 686 9. Roewe J, Stavrides G, Strueve M, Sharma A, Marini F, Mann A, Smith SA, Kaya  
687 Z, Strobl B, Mueller M, Reinhardt C, Morrissey JH, Bosmann M. 2020. Bacterial  
688 polyphosphates interfere with the innate host defense to infection. *Nat Commun*  
689 11:4035.
- 690 10. Rijal R, Cadena LA, Smith MR, Carr JF, Gomer RH. 2020. Polyphosphate is an  
691 extracellular signal that can facilitate bacterial survival in eukaryotic cells.  
692 *Proceedings of the National Academy of Sciences*  
693 doi:10.1073/pnas.2012009117:202012009.
- 694 11. McDonald B, Davis RP, Kim SJ, Tse M, Esmon CT, Kolaczkowska E, Jenne CN.  
695 2017. Platelets and neutrophil extracellular traps collaborate to promote  
696 intravascular coagulation during sepsis in mice. *Blood* 129:1357-1367.

- 697 12. Peng L, Zeng L, Jin H, Yang L, Xiao Y, Lan Z, Yu Z, Ouyang S, Zhang L, Sun N.  
698 2020. Discovery and antibacterial study of potential PPK1 inhibitors against  
699 uropathogenic *E. coli*. *J Enzyme Inhib Med Chem* 35:1224-1232.
- 700 13. Neville N, Roberge N, Ji X, Stephen P, Lu JL, Jia Z. 2021. A Dual-Specificity  
701 Inhibitor Targets Polyphosphate Kinase 1 and 2 Enzymes To Attenuate Virulence  
702 of *Pseudomonas aeruginosa*. *mBio* 12:e0059221.
- 703 14. Bravo-Toncio C, Alvarez JA, Campos F, Ortiz-Severin J, Varas M, Cabrera R,  
704 Lagos CF, Chavez FP. 2016. *Dictyostelium discoideum* as a surrogate host-  
705 microbe model for antivirulence screening in *Pseudomonas aeruginosa* PAO1.  
706 *Int J Antimicrob Agents* 47:403-9.
- 707 15. Dahl JU, Gray MJ, Bazopoulou D, Beaufay F, Lempart J, Koenigsnecht MJ,  
708 Wang Y, Baker JR, Hasler WL, Young VB, Sun D, Jakob U. 2017. The anti-  
709 inflammatory drug mesalamine targets bacterial polyphosphate accumulation.  
710 *Nat Microbiol* 2:16267.
- 711 16. Ault-Riche D, Fraley CD, Tzeng CM, Kornberg A. 1998. Novel assay reveals  
712 multiple pathways regulating stress-induced accumulations of inorganic  
713 polyphosphate in *Escherichia coli*. *J Bacteriol* 180:1841-7.
- 714 17. Gray MJ, Wholey WY, Wagner NO, Cremers CM, Mueller-Schickert A, Hock NT,  
715 Krieger AG, Smith EM, Bender RA, Bardwell JC, Jakob U. 2014. Polyphosphate  
716 is a primordial chaperone. *Mol Cell* 53:689-99.
- 717 18. Yoo NG, Dogra S, Meinen BA, Tse E, Haefliger J, Southworth DR, Gray MJ,  
718 Dahl JU, Jakob U. 2018. Polyphosphate Stabilizes Protein Unfolding  
719 Intermediates as Soluble Amyloid-like Oligomers. *J Mol Biol* 430:4195-4208.



- 720 19. Morohoshi T, Maruo T, Shirai Y, Kato J, Ikeda T, Takiguchi N, Ohtake H, Kuroda  
721 A. 2002. Accumulation of inorganic polyphosphate in phoU mutants of  
722 *Escherichia coli* and *Synechocystis* sp. strain PCC6803. *Appl Environ Microbiol*  
723 68:4107-10.
- 724 20. Kuroda A, Murphy H, Cashel M, Kornberg A. 1997. Guanosine tetra- and  
725 pentaphosphate promote accumulation of inorganic polyphosphate in  
726 *Escherichia coli*. *J Biol Chem* 272:21240-3.
- 727 21. Akiyama M, Crooke E, Kornberg A. 1993. An exopolyphosphatase of *Escherichia*  
728 *coli*. The enzyme and its ppx gene in a polyphosphate operon. *J Biol Chem*  
729 268:633-9.
- 730 22. Gray MJ. 2020. Interactions between DksA and Stress-Responsive Alternative  
731 Sigma Factors Control Inorganic Polyphosphate Accumulation in *Escherichia*  
732 *coli*. *J Bacteriol* 202:e00133-20.
- 733 23. Rudat AK, Pokhrel A, Green TJ, Gray MJ. 2018. Mutations in *Escherichia coli*  
734 Polyphosphate Kinase That Lead to Dramatically Increased In Vivo  
735 Polyphosphate Levels. *J Bacteriol* 200:e00697-17.
- 736 24. Gray MJ. 2019. Inorganic Polyphosphate Accumulation in *Escherichia coli* Is  
737 Regulated by DksA but Not by (p)ppGpp. *J Bacteriol* 201:e00664-18.
- 738 25. Danson AE, Jovanovic M, Buck M, Zhang X. 2019. Mechanisms of sigma(54)-  
739 Dependent Transcription Initiation and Regulation. *J Mol Biol* 431:3960-3974.
- 740 26. Riordan JT, Mitra A. 2017. Regulation of *Escherichia coli* Pathogenesis by  
741 Alternative Sigma Factor N. *EcoSal Plus* 7.

- 742 27. Keseler IM, Mackie A, Santos-Zavaleta A, Billington R, Bonavides-Martinez C,  
743 Caspi R, Fulcher C, Gama-Castro S, Kothari A, Krummenacker M, Latendresse  
744 M, Muniz-Rascado L, Ong Q, Paley S, Peralta-Gil M, Subhraveti P, Velazquez-  
745 Ramirez DA, Weaver D, Collado-Vides J, Paulsen I, Karp PD. 2017. The EcoCyc  
746 database: reflecting new knowledge about *Escherichia coli* K-12. *Nucleic Acids*  
747 *Res* 45:D543-D550.
- 748 28. van Heeswijk WC, Westerhoff HV, Boogerd FC. 2013. Nitrogen assimilation in  
749 *Escherichia coli*: putting molecular data into a systems perspective. *Microbiol Mol*  
750 *Biol Rev* 77:628-95.
- 751 29. Khan MA, Durica-Mitic S, Gopel Y, Heermann R, Gorke B. 2020. Small RNA-  
752 binding protein RapZ mediates cell envelope precursor sensing and signaling in  
753 *Escherichia coli*. *EMBO J* 39:e103848.
- 754 30. Gopel Y, Gorke B. 2018. Interaction of lipoprotein QseG with sensor kinase  
755 QseE in the periplasm controls the phosphorylation state of the two-component  
756 system QseE/QseF in *Escherichia coli*. *PLoS Genet* 14:e1007547.
- 757 31. Reichenbach B, Gopel Y, Gorke B. 2009. Dual control by perfectly overlapping  
758 sigma 54- and sigma 70- promoters adjusts small RNA GlmY expression to  
759 different environmental signals. *Mol Microbiol* 74:1054-70.
- 760 32. Klein G, Stupak A, Biernacka D, Wojtkiewicz P, Lindner B, Raina S. 2016.  
761 Multiple Transcriptional Factors Regulate Transcription of the *rpoE* Gene in  
762 *Escherichia coli* under Different Growth Conditions and When the  
763 Lipopolysaccharide Biosynthesis Is Defective. *J Biol Chem* 291:22999-23019.

- 764 33. Groisman EA, Duprey A, Choi J. 2021. How the PhoP/PhoQ System Controls  
765 Virulence and Mg(2+) Homeostasis: Lessons in Signal Transduction,  
766 Pathogenesis, Physiology, and Evolution. *Microbiol Mol Biol Rev* 85:e0017620.
- 767 34. Pfluger-Grau K, Gorke B. 2010. Regulatory roles of the bacterial nitrogen-related  
768 phosphotransferase system. *Trends Microbiol* 18:205-14.
- 769 35. Racki LR, Tocheva EI, Dieterle MG, Sullivan MC, Jensen GJ, Newman DK.  
770 2017. Polyphosphate granule biogenesis is temporally and functionally tied to cell  
771 cycle exit during starvation in *Pseudomonas aeruginosa*. *Proc Natl Acad Sci U S*  
772 *A* 114:E2440-E2449.
- 773 36. Ikeda TP, Shauger AE, Kustu S. 1996. *Salmonella typhimurium* apparently  
774 perceives external nitrogen limitation as internal glutamine limitation. *J Mol Biol*  
775 259:589-607.
- 776 37. Huergo LF, Dixon R. 2015. The Emergence of 2-Oxoglutarate as a Master  
777 Regulator Metabolite. *Microbiol Mol Biol Rev* 79:419-35.
- 778 38. Forchhammer K, Luddecke J. 2016. Sensory properties of the PII signalling  
779 protein family. *FEBS J* 283:425-37.
- 780 39. Blauwkamp TA, Ninfa AJ. 2002. Physiological role of the GlnK signal  
781 transduction protein of *Escherichia coli*: survival of nitrogen starvation. *Mol*  
782 *Microbiol* 46:203-14.
- 783 40. Maeda K, Westerhoff HV, Kurata H, Boogerd FC. 2019. Ranking network  
784 mechanisms by how they fit diverse experiments and deciding on *E. coli*'s  
785 ammonium transport and assimilation network. *NPJ Syst Biol Appl* 5:14.

- 786 41. Gosztolai A, Schumacher J, Behrends V, Bundy JG, Heydenreich F, Bennett MH,  
787 Buck M, Barahona M. 2017. GlnK Facilitates the Dynamic Regulation of Bacterial  
788 Nitrogen Assimilation. *Biophys J* 112:2219-2230.
- 789 42. Atkinson MR, Blauwkamp TA, Ninfa AJ. 2002. Context-dependent functions of  
790 the PII and GlnK signal transduction proteins in *Escherichia coli*. *J Bacteriol*  
791 184:5364-75.
- 792 43. Baba T, Ara T, Hasegawa M, Takai Y, Okumura Y, Baba M, Datsenko KA,  
793 Tomita M, Wanner BL, Mori H. 2006. Construction of *Escherichia coli* K-12 in-  
794 frame, single-gene knockout mutants: the Keio collection. *Mol Syst Biol* 2:2006  
795 0008.
- 796 44. He B, Choi KY, Zalkin H. 1993. Regulation of *Escherichia coli* *glnB*, *prsA*, and  
797 *speA* by the purine repressor. *J Bacteriol* 175:3598-606.
- 798 45. Santos-Zavaleta A, Salgado H, Gama-Castro S, Sanchez-Perez M, Gomez-  
799 Romero L, Ledezma-Tejeida D, Garcia-Sotelo JS, Alquicira-Hernandez K, Muniz-  
800 Rascado LJ, Pena-Loredo P, Ishida-Gutierrez C, Velazquez-Ramirez DA, Del  
801 Moral-Chavez V, Bonavides-Martinez C, Mendez-Cruz CF, Galagan J, Collado-  
802 Vides J. 2019. RegulonDB v 10.5: tackling challenges to unify classic and high  
803 throughput knowledge of gene regulation in *E. coli* K-12. *Nucleic Acids Res*  
804 47:D212-D220.
- 805 46. Blauwkamp TA, Ninfa AJ. 2003. Antagonism of PII signalling by the AmtB protein  
806 of *Escherichia coli*. *Mol Microbiol* 48:1017-28.
- 807 47. Rodionova IA, Goodacre N, Babu M, Emili A, Uetz P, Saier MH, Jr. 2018. The  
808 Nitrogen Regulatory PII Protein (GlnB) and N-Acetylglucosamine 6-Phosphate

- 809 Epimerase (NanE) Allosterically Activate Glucosamine 6-Phosphate Deaminase  
810 (NagB) in *Escherichia coli*. *J Bacteriol* 200.
- 811 48. Schubert C, Zedler S, Strecker A, Uden G. 2021. L-Aspartate as a high-quality  
812 nitrogen source in *Escherichia coli*: Regulation of L-aspartase by the nitrogen  
813 regulatory system and interaction of L-aspartase with GlnB. *Mol Microbiol*  
814 115:526-538.
- 815 49. Atkinson MR, Ninfa AJ. 1998. Role of the GlnK signal transduction protein in the  
816 regulation of nitrogen assimilation in *Escherichia coli*. *Mol Microbiol* 29:431-47.
- 817 50. Sezonov G, Joseleau-Petit D, D'Ari R. 2007. *Escherichia coli* physiology in Luria-  
818 Bertani broth. *J Bacteriol* 189:8746-9.
- 819 51. Bennett BD, Kimball EH, Gao M, Osterhout R, Van Dien SJ, Rabinowitz JD.  
820 2009. Absolute metabolite concentrations and implied enzyme active site  
821 occupancy in *Escherichia coli*. *Nat Chem Biol* 5:593-9.
- 822 52. Yakhnin H, Aichele R, Ades SE, Romeo T, Babitzke P. 2017. Circuitry Linking  
823 the Global Csr- and sigma(E)-Dependent Cell Envelope Stress Response  
824 Systems. *J Bacteriol* 199.
- 825 53. Hews CL, Cho T, Rowley G, Raivio TL. 2019. Maintaining Integrity Under Stress:  
826 Envelope Stress Response Regulation of Pathogenesis in Gram-Negative  
827 Bacteria. *Front Cell Infect Microbiol* 9:313.
- 828 54. Durica-Mitic S, Gopel Y, Amman F, Gorke B. 2020. Adaptor protein RapZ  
829 activates endoribonuclease RNase E by protein-protein interaction to cleave a  
830 small regulatory RNA. *RNA* 26:1198-1215.

- 831 55. Teplyakov A, Leriche C, Obmolova G, Badet B, Badet-Denisot MA. 2002. From  
832 Lobry de Bruyn to enzyme-catalyzed ammonia channelling: molecular studies of  
833 D-glucosamine-6P synthase. *Nat Prod Rep* 19:60-9.
- 834 56. Mouilleron S, Badet-Denisot MA, Badet B, Golinelli-Pimpaneau B. 2011.  
835 Dynamics of glucosamine-6-phosphate synthase catalysis. *Arch Biochem*  
836 *Biophys* 505:1-12.
- 837 57. Wang H, Yin X, Wu Orr M, Dambach M, Curtis R, Storz G. 2017. Increasing  
838 intracellular magnesium levels with the 31-amino acid MgtS protein. *Proc Natl*  
839 *Acad Sci U S A* 114:5689-5694.
- 840 58. Guzman LM, Belin D, Carson MJ, Beckwith J. 1995. Tight regulation, modulation,  
841 and high-level expression by vectors containing the arabinose PBAD promoter. *J*  
842 *Bacteriol* 177:4121-30.
- 843 59. Alvarez-Anorve LI, Bustos-Jaimes I, Calcagno ML, Plumbridge J. 2009. Allosteric  
844 regulation of glucosamine-6-phosphate deaminase (NagB) and growth of  
845 *Escherichia coli* on glucosamine. *J Bacteriol* 191:6401-7.
- 846 60. Kalamorz F, Reichenbach B, Marz W, Rak B, Gorke B. 2007. Feedback control  
847 of glucosamine-6-phosphate synthase GlnS expression depends on the small  
848 RNA GlnZ and involves the novel protein YhbJ in *Escherichia coli*. *Mol Microbiol*  
849 65:1518-33.
- 850 61. Plumbridge JA, Cochet O, Souza JM, Altamirano MM, Calcagno ML, Badet B.  
851 1993. Coordinated regulation of amino sugar-synthesizing and -degrading  
852 enzymes in *Escherichia coli* K-12. *J Bacteriol* 175:4951-6.

- 853 62. Choi J, Kim H, Chang Y, Yoo W, Kim D, Ryu S. 2019. Programmed Delay of a  
854 Virulence Circuit Promotes Salmonella Pathogenicity. *mBio* 10.
- 855 63. Yoo W, Choi J, Park B, Byndloss MX, Ryu S. 2021. A Nitrogen Metabolic  
856 Enzyme Provides Salmonella Fitness Advantage by Promoting Utilization of  
857 Microbiota-Derived Carbon Source. *ACS Infect Dis*  
858 doi:10.1021/acsinfecdis.0c00836.
- 859 64. Yoo W, Yoon H, Seok YJ, Lee CR, Lee HH, Ryu S. 2016. Fine-tuning of amino  
860 sugar homeostasis by EIIA(Ntr) in Salmonella Typhimurium. *Sci Rep* 6:33055.
- 861 65. Kim HJ, Lee CR, Kim M, Peterkofsky A, Seok YJ. 2011. Dephosphorylated NPr  
862 of the nitrogen PTS regulates lipid A biosynthesis by direct interaction with LpxD.  
863 *Biochem Biophys Res Commun* 409:556-61.
- 864 66. Lee J, Park YH, Kim YR, Seok YJ, Lee CR. 2015. Dephosphorylated NPr is  
865 involved in an envelope stress response of Escherichia coli. *Microbiology*  
866 (Reading) 161:1113-1123.
- 867 67. Choi J, Ryu S. 2019. Regulation of Iron Uptake by Fine-Tuning the Iron  
868 Responsiveness of the Iron Sensor Fur. *Appl Environ Microbiol* 85.
- 869 68. Deutscher J, Ake FM, Derkaoui M, Zebre AC, Cao TN, Bouraoui H, Kentache T,  
870 Mokhtari A, Milohanic E, Joyet P. 2014. The bacterial  
871 phosphoenolpyruvate:carbohydrate phosphotransferase system: regulation by  
872 protein phosphorylation and phosphorylation-dependent protein-protein  
873 interactions. *Microbiol Mol Biol Rev* 78:231-56.

- 874 69. Lee CR, Park YH, Kim M, Kim YR, Park S, Peterkofsky A, Seok YJ. 2013.  
875 Reciprocal regulation of the autophosphorylation of enzyme INtr by glutamine  
876 and alpha-ketoglutarate in *Escherichia coli*. *Mol Microbiol* 88:473-85.
- 877 70. Rabus R, Reizer J, Paulsen I, Saier MH, Jr. 1999. Enzyme I(Ntr) from  
878 *Escherichia coli*. A novel enzyme of the phosphoenolpyruvate-dependent  
879 phosphotransferase system exhibiting strict specificity for its phosphoryl  
880 acceptor, NPr. *J Biol Chem* 274:26185-91.
- 881 71. Karstens K, Zschiedrich CP, Bowien B, Stulke J, Gorke B. 2014.  
882 Phosphotransferase protein EIIANtr interacts with SpoT, a key enzyme of the  
883 stringent response, in *Ralstonia eutropha* H16. *Microbiology (Reading)* 160:711-  
884 722.
- 885 72. Mork-Morkenstein M, Heermann R, Gopel Y, Jung K, Gorke B. 2017. Non-  
886 canonical activation of histidine kinase KdpD by phosphotransferase protein PtsN  
887 through interaction with the transmitter domain. *Mol Microbiol* 106:54-73.
- 888 73. Karimova G, Pidoux J, Ullmann A, Ladant D. 1998. A bacterial two-hybrid system  
889 based on a reconstituted signal transduction pathway. *Proc Natl Acad Sci U S A*  
890 95:5752-6.
- 891 74. Rhodius VA, Suh WC, Nonaka G, West J, Gross CA. 2006. Conserved and  
892 variable functions of the sigmaE stress response in related genomes. *PLoS Biol*  
893 4:e2.
- 894 75. Hayden JD, Ades SE. 2008. The extracytoplasmic stress factor, sigmaE, is  
895 required to maintain cell envelope integrity in *Escherichia coli*. *PLoS One*  
896 3:e1573.



- 897 76. Costanzo A, Nicoloff H, Barchinger SE, Banta AB, Gourse RL, Ades SE. 2008.  
898 ppGpp and DksA likely regulate the activity of the extracytoplasmic stress factor  
899 sigmaE in *Escherichia coli* by both direct and indirect mechanisms. *Mol Microbiol*  
900 67:619-32.
- 901 77. Loffler M, Simen JD, Muller J, Jager G, Laghrami S, Schaferhoff K, Freund A,  
902 RecogNice T, Takors R. 2017. Switching between nitrogen and glucose  
903 limitation: Unraveling transcriptional dynamics in *Escherichia coli*. *J Biotechnol*  
904 258:2-12.
- 905 78. Wang L, Yan J, Wise MJ, Liu Q, Asenso J, Huang Y, Dai S, Liu Z, Du Y, Tang D.  
906 2018. Distribution Patterns of Polyphosphate Metabolism Pathway and Its  
907 Relationships With Bacterial Durability and Virulence. *Front Microbiol* 9:782.
- 908 79. Achbergerova L, Nahalka J. 2011. Polyphosphate--an ancient energy source and  
909 active metabolic regulator. *Microb Cell Fact* 10:63.
- 910 80. Gottesman S. 2019. Trouble is coming: Signaling pathways that regulate general  
911 stress responses in bacteria. *J Biol Chem* 294:11685-11700.
- 912 81. Schellhorn HE. 2020. Function, Evolution, and Composition of the RpoS Regulon  
913 in *Escherichia coli*. *Front Microbiol* 11:560099.
- 914 82. Saha S, Lach SR, Konovalova A. 2021. Homeostasis of the Gram-negative cell  
915 envelope. *Curr Opin Microbiol* 61:99-106.
- 916 83. Luttmann D, Gopel Y, Gorke B. 2012. The phosphotransferase protein EIIA(Ntr)  
917 modulates the phosphate starvation response through interaction with histidine  
918 kinase PhoR in *Escherichia coli*. *Mol Microbiol* 86:96-110.

- 919 84. Luttmann D, Heermann R, Zimmer B, Hillmann A, Rampp IS, Jung K, Gorke B.  
920 2009. Stimulation of the potassium sensor KdpD kinase activity by interaction  
921 with the phosphotransferase protein IIA(Ntr) in *Escherichia coli*. *Mol Microbiol*  
922 72:978-94.
- 923 85. Lee CR, Cho SH, Kim HJ, Kim M, Peterkofsky A, Seok YJ. 2010. Potassium  
924 mediates *Escherichia coli* enzyme IIA(Ntr) -dependent regulation of sigma factor  
925 selectivity. *Mol Microbiol* 78:1468-83.
- 926 86. Lee CR, Cho SH, Yoon MJ, Peterkofsky A, Seok YJ. 2007. *Escherichia coli*  
927 enzyme IIA(Ntr) regulates the K<sup>+</sup> transporter TrkA. *Proc Natl Acad Sci U S A*  
928 104:4124-9.
- 929 87. Grillo-Puertas M, Rintoul MR, Rapisarda VA. 2016. PhoB activation in non-  
930 limiting phosphate condition by the maintenance of high polyphosphate levels in  
931 the stationary phase inhibits biofilm formation in *Escherichia coli*. *Microbiology*  
932 (Reading) 162:1000-1008.
- 933 88. Hirota R, Motomura K, Nakai S, Handa T, Ikeda T, Kuroda A. 2013. Stable  
934 polyphosphate accumulation by a pseudo-revertant of an *Escherichia coli* phoU  
935 mutant. *Biotechnol Lett* 35:695-701.
- 936 89. Gravina F, Degaut FL, Gerhardt ECM, Pedrosa FO, Souza EM, Antonio de  
937 Souza G, Huergo LF. 2021. The protein-protein interaction network of the  
938 *Escherichia coli* EIIA(Ntr) regulatory protein reveals a role in cell motility and  
939 metabolic control. *Res Microbiol* doi:10.1016/j.resmic.2021.103882:103882.

- 940 90. Zwir I, Shin D, Kato A, Nishino K, Latifi T, Solomon F, Hare JM, Huang H,  
941 Groisman EA. 2005. Dissecting the PhoP regulatory network of *Escherichia coli*  
942 and *Salmonella enterica*. *Proc Natl Acad Sci U S A* 102:2862-7.
- 943 91. Yeom J, Gao X, Groisman EA. 2018. Reduction in adaptor amounts establishes  
944 degradation hierarchy among protease substrates. *Proc Natl Acad Sci U S A*  
945 115:E4483-E4492.
- 946 92. Yeom J, Groisman EA. 2021. Reduced ATP-dependent proteolysis of functional  
947 proteins during nutrient limitation speeds the return of microbes to a growth state.  
948 *Sci Signal* 14.
- 949 93. Ahn K, Kornberg A. 1990. Polyphosphate kinase from *Escherichia coli*.  
950 Purification and demonstration of a phosphoenzyme intermediate. *J Biol Chem*  
951 265:11734-9.
- 952 94. Guo B, Bi Y. 2002. Cloning PCR products. An overview. *Methods Mol Biol*  
953 192:111-9.
- 954 95. Sambrook J, Fritsch EF, Maniatis T. 1989. *Molecular Cloning: A Laboratory*  
955 *Manual*, 2 ed. Cold Spring Harbor Laboratory Press, Cold Spring Harbor, NY.
- 956 96. Bertani G. 1951. Studies on lysogenesis. I. The mode of phage liberation by  
957 lysogenic *Escherichia coli*. *J Bacteriol* 62:293-300.
- 958 97. Daimon Y, Narita S, Akiyama Y. 2015. Activation of Toxin-Antitoxin System  
959 Toxins Suppresses Lethality Caused by the Loss of sigmaE in *Escherichia coli*. *J*  
960 *Bacteriol* 197:2316-24.
- 961 98. Chen IA, Chu K, Palaniappan K, Ratner A, Huang J, Huntemann M, Hajek P,  
962 Ritter S, Varghese N, Seshadri R, Roux S, Woyke T, Elie-Fadrosh EA, Ivanova

- 963 NN, Kyrpides NC. 2021. The IMG/M data management and analysis system  
964 v.6.0: new tools and advanced capabilities. *Nucleic Acids Res* 49:D751-D763.
- 965 99. Blattner FR, Plunkett G, 3rd, Bloch CA, Perna NT, Burland V, Riley M, Collado-  
966 Vides J, Glasner JD, Rode CK, Mayhew GF, Gregor J, Davis NW, Kirkpatrick  
967 HA, Goeden MA, Rose DJ, Mau B, Shao Y. 1997. The complete genome  
968 sequence of *Escherichia coli* K-12. *Science* 277:1453-62.
- 969 100. Silhavy TJ, Berman ML, Enquist LW. 1984. Experiments with gene fusions. Cold  
970 Spring Harbor Laboratory, Cold Spring Harbor, NY.
- 971 101. Datsenko KA, Wanner BL. 2000. One-step inactivation of chromosomal genes in  
972 *Escherichia coli* K-12 using PCR products. *Proc Natl Acad Sci U S A* 97:6640-5.
- 973 102. Uzzau S, Figueroa-Bossi N, Rubino S, Bossi L. 2001. Epitope tagging of  
974 chromosomal genes in *Salmonella*. *Proc Natl Acad Sci U S A* 98:15264-9.
- 975 103. Bonocora RP, Smith C, Lapierre P, Wade JT. 2015. Genome-Scale Mapping of  
976 *Escherichia coli* sigma54 Reveals Widespread, Conserved Intragenic Binding.  
977 *PLoS Genet* 11:e1005552.
- 978 104. Watson JF, Garcia-Nafria J. 2019. In vivo DNA assembly using common  
979 laboratory bacteria: A re-emerging tool to simplify molecular cloning. *J Biol Chem*  
980 294:15271-15281.
- 981 105. De Genst EJ, Guilliams T, Wellens J, O'Day EM, Waudby CA, Meehan S,  
982 Dumoulin M, Hsu ST, Cremades N, Verschueren KH, Pardon E, Wyns L,  
983 Steyaert J, Christodoulou J, Dobson CM. 2010. Structure and properties of a  
984 complex of alpha-synuclein and a single-domain camelid antibody. *J Mol Biol*  
985 402:326-43.

- 986 106. Cormack BP, Valdivia RH, Falkow S. 1996. FACS-optimized mutants of the  
987 green fluorescent protein (GFP). *Gene* 173:33-8.
- 988 107. Huang Y, Zhang L. 2017. An In Vitro Single-Primer Site-Directed Mutagenesis  
989 Method for Use in Biotechnology. *Methods Mol Biol* 1498:375-383.
- 990 108. Pokhrel A, Lingo JC, Wolschendorf F, Gray MJ. 2019. Assaying for Inorganic  
991 Polyphosphate in Bacteria. *J Vis Exp* doi:10.3791/58818:e58818.
- 992 109. Neidhardt FC, Bloch PL, Smith DF. 1974. Culture medium for enterobacteria. *J*  
993 *Bacteriol* 119:736-47.
- 994 110. Wurst H, Kornberg A. 1994. A soluble exopolyphosphatase of *Saccharomyces*  
995 *cerevisiae*. Purification and characterization. *J Biol Chem* 269:10996-1001.
- 996 111. Christ JJ, Blank LM. 2018. Enzymatic quantification and length determination of  
997 polyphosphate down to a chain length of two. *Anal Biochem* 548:82-90.
- 998 112. Schmittgen TD, Livak KJ. 2008. Analyzing real-time PCR data by the  
999 comparative C(T) method. *Nat Protoc* 3:1101-8.
- 1000 113. Schaefer J, Jovanovic G, Kotta-Loizou I, Buck M. 2016. Single-step method for  
1001 beta-galactosidase assays in *Escherichia coli* using a 96-well microplate reader.  
1002 *Anal Biochem* 503:56-7.
- 1003 114. Pillai-Kastoori L, Schutz-Geschwender AR, Harford JA. 2020. A systematic  
1004 approach to quantitative Western blot analysis. *Anal Biochem* 593:113608.
- 1005 115. Kurien BT, Scofield RH. 2009. Introduction to protein blotting. *Methods Mol Biol*  
1006 536:9-22.
- 1007 116. Schneider CA, Rasband WS, Eliceiri KW. 2012. NIH Image to ImageJ: 25 years  
1008 of image analysis. *Nat Methods* 9:671-5.

1009

1010 **TABLE 1.** Strains and plasmids used in this study. Unless otherwise indicated, all  
 1011 strains and plasmids were generated in the course of this work. Abbreviations: Ap<sup>R</sup>,  
 1012 ampicillin resistance; Cm<sup>R</sup>, chloramphenicol resistance; Em<sup>D</sup>, erythromycin  
 1013 dependance; Gm<sup>R</sup>, gentamycin resistance; Kn<sup>R</sup>, kanamycin resistance; Sp<sup>R</sup>,  
 1014 spectinomycin resistance; Sm<sup>R</sup>, streptomycin resistance.

1015

| Strain                         | Marker(s)       | Relevant Genotype                                                                                                                                                                                                                                          | Source           |
|--------------------------------|-----------------|------------------------------------------------------------------------------------------------------------------------------------------------------------------------------------------------------------------------------------------------------------|------------------|
| <u><i>E. coli</i> strains:</u> |                 |                                                                                                                                                                                                                                                            |                  |
| DH5 $\alpha$                   |                 | F <sup>-</sup> , $\lambda$ <sup>-</sup> , $\phi$ 80 <i>lacZ</i> $\Delta$ M15 $\Delta$ ( <i>lacZYA-argF</i> )U169<br><i>recA1 endA1 hsdR17</i> (r <sub>K</sub> <sup>-</sup> , m <sub>K</sub> <sup>+</sup> ) <i>phoA supE44</i><br><i>thi-1 gyrA96 relA1</i> | Invitrogen       |
| BL21(DE3)                      |                 | F <sup>-</sup> , <i>ompT gal dcm lon hsdSB</i> (r <sub>B</sub> <sup>-</sup> m <sub>B</sub> <sup>-</sup> ) $\lambda$ (DE3<br>[ <i>lacI lacUV5-T7 gene 1 ind1 sam7 nin5</i> ])                                                                               | EMD<br>Millipore |
| BTH101                         | Sm <sup>R</sup> | F <sup>-</sup> , <i>cya-99 araD139 galE15 galK16 rpsL1</i><br><i>hsdR2 mcrA1 mcrB1</i>                                                                                                                                                                     | (73)             |
| MG1655                         |                 | F <sup>-</sup> , $\lambda$ <sup>-</sup> , <i>rph-1 ilvG<sup>-</sup> rfb-50</i>                                                                                                                                                                             | (99)             |
| MJG1419                        | Cm <sup>R</sup> | MG1655 $\Delta$ <i>dkSA1000::cat</i> <sup>+</sup>                                                                                                                                                                                                          | (24)             |
| MJG1479                        | Cm <sup>R</sup> | MG1655 $\Delta$ <i>mgtS1000::cat</i> <sup>+</sup>                                                                                                                                                                                                          |                  |
| MJG1480                        | Kn <sup>R</sup> | MG1655 $\Delta$ <i>phoP790::kan</i> <sup>+</sup>                                                                                                                                                                                                           |                  |
| MJG1483                        | Kn <sup>R</sup> | MG1655 $\Delta$ <i>mgtA789::kan</i> <sup>+</sup>                                                                                                                                                                                                           |                  |
| MJG1484                        | Kn <sup>R</sup> | MG1655 $\Delta$ <i>phoQ789::kan</i> <sup>+</sup>                                                                                                                                                                                                           |                  |
| MJG1501                        |                 | MG1655 $\Delta$ <i>phoP790</i>                                                                                                                                                                                                                             |                  |

|         |                                 |                                               |      |
|---------|---------------------------------|-----------------------------------------------|------|
| MJG1763 |                                 | MG1655 $\Delta rpoN730::kan^+$                | (22) |
| MJG1766 |                                 | MG1655 $\Delta rpoN730$                       | (22) |
| MJG1767 | Em <sup>D</sup> Kn <sup>R</sup> | MG1655 $\Delta rpoE1000::kan^+$               | (22) |
| MJG1955 | Kn <sup>R</sup>                 | MG1655 $\Delta glrR728::kan^+$                |      |
| MJG1956 | Kn <sup>R</sup>                 | MG1655 $\Delta atoC774::kan^+$                |      |
| MJG1969 | Kn <sup>R</sup>                 | MG1655 $\Delta hyfR739::kan^+$                |      |
| MJG1970 | Kn <sup>R</sup>                 | MG1655 $\Delta pspF739::kan^+$                |      |
| MJG1971 | Kn <sup>R</sup>                 | MG1655 $\Delta norR784::kan^+$                |      |
| MJG1972 | Kn <sup>R</sup>                 | MG1655 $\Delta ygeV720::kan^+$                |      |
| MJG1973 | Kn <sup>R</sup>                 | MG1655 $\Delta rtcR755::kan^+$                |      |
| MJG1974 | Kn <sup>R</sup>                 | MG1655 $\Delta prpR772::kan^+$                |      |
| MJG1975 | Kn <sup>R</sup>                 | MG1655 $\Delta zraR775::kan^+$                |      |
| MJG1976 | Kn <sup>R</sup>                 | MG1655 $\Delta fhIA735::kan^+$                |      |
| MJG2058 | Kn <sup>R</sup>                 | MG1655 $\Delta glnB727::kan^+$                |      |
| MJG2061 | Kn <sup>R</sup>                 | MG1655 $\Delta glnK736::kan^+$                |      |
| MJG2064 | Kn <sup>R</sup>                 | MG1655 $\Delta glnG730::kan^+$                |      |
| MJG2065 |                                 | MG1655 $\Delta glrR728$                       |      |
| MJG2068 | Kn <sup>R</sup>                 | MG1655 $\Delta glrR728 \Delta glnG730::kan^+$ |      |
| MJG2082 |                                 | MG1655 $\Delta glnB727$                       |      |
| MJG2083 | Kn <sup>R</sup>                 | MG1655 $\Delta glnB727 \Delta glnK736::kan^+$ |      |
| MJG2086 | Kn <sup>R</sup>                 | MG1655 $\Delta ptsN732::kan^+$                |      |
| MJG2089 |                                 | MG1655 $\Delta ptsN732$                       |      |
| MJG2090 | Kn <sup>R</sup>                 | MG1655 $\Delta npr-734::kan^+$                |      |

|         |                 |                                            |
|---------|-----------------|--------------------------------------------|
| MJG2091 | Kn <sup>R</sup> | MG1655 $\Delta ptsP753::kan^+$             |
| MJG2112 | Kn <sup>R</sup> | MG1655 $\Delta rapZ733::kan^+$             |
| MJG2114 |                 | MG1655 $\Delta rapZ733$                    |
| MJG2151 | Cm <sup>R</sup> | MG1655 $\Delta glmZ1000::cat^+$            |
| MJG2155 | Cm <sup>R</sup> | MG1655 $\Delta glmY1000::cat^+$            |
| MJG2179 | Kn <sup>R</sup> | MG1655 $ptsN-3xFLAG::kan^+$                |
| MJG2191 |                 | MG1655 $ptsN-3xFLAG$                       |
| MJG2193 | Kn <sup>R</sup> | MG1655 $ptsN-3xFLAG \Delta phoP790::kan^+$ |
| MJG2200 | Kn <sup>R</sup> | MG1655 $ptsN-3xFLAG \Delta rpoN730::kan^+$ |
| MJG2202 |                 | MG1655 $ptsN-3xFLAG \Delta rpoN730$        |

---

Plasmids:

|            |                                 |                                                                       |         |
|------------|---------------------------------|-----------------------------------------------------------------------|---------|
| pBAD18     | Ap <sup>R</sup>                 | <i>bla</i> <sup>+</sup>                                               | (58)    |
| pBAD24     | Ap <sup>R</sup>                 | <i>bla</i> <sup>+</sup>                                               | (58)    |
| pCDFDuet-1 | Sp <sup>R</sup>                 | <i>aadA</i> <sup>+</sup>                                              | Novagen |
| pCP20      | Ap <sup>R</sup> Cm <sup>R</sup> | Flp <sup>+</sup> <i>bla</i> <sup>+</sup> <i>cat</i> <sup>+</sup>      | (101)   |
| pDKSA1     | Ap <sup>R</sup>                 | <i>dksA</i> <sup>+</sup> <i>bla</i> <sup>+</sup>                      | (24)    |
| pET-21b(+) | Ap <sup>R</sup>                 | <i>bla</i> <sup>+</sup>                                               | Novagen |
| pGCN4zip1  | Kn <sup>R</sup>                 | T25-GCN4zip <i>kan</i> <sup>+</sup>                                   |         |
| pGCN4zip3  | Ap <sup>R</sup>                 | GCN4zip-T18 <i>bla</i> <sup>+</sup>                                   |         |
| pGFP3      | Sp <sup>R</sup>                 | <i>gfpmut3</i> <sup>+</sup> <i>aadA</i> <sup>+</sup>                  |         |
| pGFP4      | Sp <sup>R</sup>                 | <i>P<sub>mgtS</sub>-gfpmut3</i> <sup>+</sup> <i>aadA</i> <sup>+</sup> |         |
| pGLMS1     | Ap <sup>R</sup>                 | <i>glmS</i> <sup>+</sup> <i>bla</i> <sup>+</sup>                      |         |
| pGLNB1     | Ap <sup>R</sup>                 | <i>glnB</i> <sup>+</sup> <i>bla</i> <sup>+</sup>                      |         |



|        |                                 |                                                                                                   |       |
|--------|---------------------------------|---------------------------------------------------------------------------------------------------|-------|
| pGLNK1 | Ap <sup>R</sup>                 | <i>glnK<sup>+</sup> bla<sup>+</sup></i>                                                           |       |
| pKD3   | Cm <sup>R</sup>                 | <i>cat<sup>+</sup></i>                                                                            | (101) |
| pKD46  | Ap <sup>R</sup>                 | $\lambda$ Red <sup>+</sup> <i>bla<sup>+</sup></i>                                                 | (101) |
| pKNT25 | Kn <sup>R</sup>                 | T25 <i>kan<sup>+</sup></i>                                                                        | (73)  |
| pKT25  | Kn <sup>R</sup>                 | T25 <i>kan<sup>+</sup></i>                                                                        | (73)  |
| pPPK12 | Kn <sup>R</sup>                 | <i>ppk-T25 kan<sup>+</sup></i>                                                                    |       |
| pPPK13 | Kn <sup>R</sup>                 | T25- <i>ppk kan<sup>+</sup></i>                                                                   |       |
| pPPK33 | Ap <sup>R</sup>                 | <i>ppk-GAAEPEA bla<sup>+</sup></i>                                                                |       |
| pPTSN1 | Ap <sup>R</sup>                 | <i>ptsN<sup>+</sup> bla<sup>+</sup></i>                                                           |       |
| pPTSN2 | Ap <sup>R</sup>                 | <i>ptsN<sup>C217G, T219A</sup></i> (encoding PtsN <sup>H73E</sup> ) <i>bla<sup>+</sup></i>        |       |
| pPTSN3 | Ap <sup>R</sup>                 | <i>ptsN<sup>C217G, A218C, T219G</sup></i> (encoding PtsN <sup>H73A</sup> ) <i>bla<sup>+</sup></i> |       |
| pPTSN5 | Ap <sup>R</sup>                 | T18- <i>ptsN bla<sup>+</sup></i>                                                                  |       |
| pRPOE1 | Ap <sup>R</sup>                 | <i>rpoE<sup>+</sup> bla<sup>+</sup></i>                                                           | (22)  |
| pRpoN  | Ap <sup>R</sup>                 | <i>rpoN<sup>+</sup> bla<sup>+</sup></i>                                                           | (103) |
| pSUB11 | Ap <sup>R</sup> Kn <sup>R</sup> | 3xFLAG <i>kan<sup>+</sup> bla<sup>+</sup></i>                                                     | (102) |
| pUT18  | Ap <sup>R</sup>                 | T18 <i>bla<sup>+</sup></i>                                                                        | (73)  |
| pUT18C | Ap <sup>R</sup>                 | T18 <i>bla<sup>+</sup></i>                                                                        | (73)  |

1016

1017 **TABLE 2.** Primers used for quantitative RT-PCR

| Gene        | Forward Primer         | Reverse Primer       |
|-------------|------------------------|----------------------|
| <i>yqfB</i> | GACGAGTCTGAATCGCACTT   | TGTGTCTGACCGGGATAGAT |
| <i>glmS</i> | GCAACGTGATGTAGCAGAAATC | CCAGCGAGTGTGAGCAATA  |
| <i>glnK</i> | GAAGCTGGTGACCGTGATAAT  | TCAGCAATCGCCACATCAA  |

*mgtA*                    GGTGATGCCCGAAGAAGAA                    CGCCGAGAATGGTGAGTAAA

1018

1019 **FIGURE LEGENDS**

1020

1021 **FIG 1** The bEBPs GlnG and GlnR influence polyP production. (A) *E. coli* MG1655 wild-  
1022 type or  $\Delta rpoN730$  containing either pBAD24 (VOC) or pRpoN (*rpoN*<sup>+</sup>) plasmids were  
1023 grown at 37°C to  $A_{600}=0.2-0.4$  in LB containing 2 g l<sup>-1</sup> arabinose (black circles) and then  
1024 shifted to minimal medium containing 2 g l<sup>-1</sup> arabinose for 2 hours (white circles)(n=3,  $\pm$   
1025 SD). (B) MG1655 wild-type,  $\Delta glnG730::kan^+$ ,  $\Delta glrR728$ , or  $\Delta glrR728 \Delta glnG730::kan^+$   
1026 were grown at 37°C to  $A_{600}=0.2-0.4$  in LB (black circles) and then shifted to minimal  
1027 medium for 2 hours (white circles)(n=3,  $\pm$  SD). (C) MG1655 wild-type,  $\Delta rpoN730$ ,  
1028  $\Delta atoC774::kan^+$ ,  $\Delta hyfR739::kan^+$ ,  $\Delta norR784::kan^+$ ,  $\Delta prpR772::kan^+$ ,  $\Delta pspF739::kan^+$ ,  
1029  $\Delta rtcR755::kan^+$ ,  $\Delta ygeV720::kan^+$ , or  $\Delta zraR775::kan^+$  were grown at 37°C to  $A_{600}=0.2-$   
1030  $0.4$  in LB (black circles) and then shifted to minimal medium for 2 hours (white  
1031 circles)(n=3-6,  $\pm$  SD). PolyP concentrations are in terms of individual phosphate  
1032 monomers. Asterisks indicate polyP levels significantly different from those of the wild-  
1033 type control for a given experiment (two-way repeated measures ANOVA with Holm-  
1034 Sidak's multiple comparisons test, \*\* = P<0.01, \*\*\*\* = P<0.0001).

1035

1036 **FIG 2** RpoN-dependent regulation of polyP synthesis is dependent on cellular nitrogen  
1037 status, but not on GlnB or GlnK *per se*. (A) Simplified model of the regulation of GlnA  
1038 (glutamine synthetase) activity in response to changes in the intracellular glutamate (E)  
1039 to glutamine (Q) ratio. (B) Diagram of the *glnK* and *glnB* loci in *E. coli*. (C) *E. coli*

1040 MG1655 wild-type was grown at 37°C to  $A_{600}=0.2-0.4$  in rich medium (LB) and then  
1041 shifted to minimal medium (MOPS with no amino acids, 4 g l<sup>-1</sup> glucose, 0.1 mM  
1042 K<sub>2</sub>HPO<sub>4</sub>, 0.1 mM uracil) for 2 hours. qRT-PCR was used to measure fold changes in  
1043 *glnK* transcript abundance at the indicated timepoints (n=3, ± SD), normalized to  
1044 expression before stress treatment (t = 0 h). (D, E) *E. coli* MG1655 wild-type,  $\Delta rpoN730$ ,  
1045 or  $\Delta dksA1000::cat^+$  containing either pBAD18 (VOC), pGLNB1 (*glnB*<sup>+</sup>) or pGLNK1  
1046 (*glnK*<sup>+</sup>) plasmids were grown at 37°C to  $A_{600}=0.2-0.4$  in LB containing 2 g l<sup>-1</sup> arabinose  
1047 (black circles) and then shifted to minimal medium supplemented with 2 g l<sup>-1</sup> arabinose  
1048 for 2 hours (white circles)(n=3-4, ± SD). (F) MG1655 wild-type,  $\Delta dksA1000::cat^+$ ,  
1049  $\Delta glnG730::kan^+$ ,  $\Delta glnK736::kan^+$ ,  $\Delta glnB727$ , or  $\Delta glnB727 \Delta glnK736::kan^+$  were grown at  
1050 37°C to  $A_{600}=0.2-0.4$  in LBQ (black circles) and then shifted to minimal medium for 2  
1051 hours (white circles)(n=3-5, ± SD). PolyP concentrations are in terms of individual  
1052 phosphate monomers. Asterisks indicate polyP levels significantly different from those  
1053 of the wild-type control for a given experiment (two-way repeated measures ANOVA  
1054 with Holm-Sidak's multiple comparisons test, ns = not significant \* = P<0.05, \*\* =  
1055 P<0.01, \*\*\*\* = P<0.0001). (G) Specific activity of purified PPK in the presence of the  
1056 indicated compounds (n=3, ±SD; one-way ANOVA, ns = not significant).

1057  
1058 **FIG 3** Effect of *glnY* and GlmS (glutamine--fructose-6-phosphate aminotransferase)  
1059 regulation on polyP production. (A) Diagram of the GlrR- and PhoP-dependent  
1060 pathways which regulate GlmS expression in *E. coli*. (B) MG1655 wild-type,  
1061  $\Delta phoP790::kan^+$ ,  $\Delta phoQ789::kan^+$ ,  $\Delta mgtA789::kan^+$ , or  $\Delta mgtS1000::cat^+$  were grown at  
1062 37°C to  $A_{600}=0.2-0.4$  in LB (black circles) and then shifted to minimal medium for 2

1063 hours (white circles)(n=3,  $\pm$  SD). (C) *E. coli* MG1655 wild-type was grown at 37°C to  
1064  $A_{600}=0.2-0.4$  in rich medium (LB) and then shifted to minimal medium (MOPS with no  
1065 amino acids, 4 g l<sup>-1</sup> glucose, 0.1 mM K<sub>2</sub>HPO<sub>4</sub>, 0.1 mM uracil) for 2 hours. qRT-PCR was  
1066 used to measure fold changes in *glmS* transcript abundance at the indicated timepoints  
1067 (n=3,  $\pm$  SD), normalized to expression before stress treatment (t = 0 h). (D) Specific  
1068 activity of purified PPK in the presence of the indicated compounds (n=3,  $\pm$ SD; one-way  
1069 ANOVA, ns = not significant).

1070

1071 **FIG 4** PolyP regulation by RapZ and GlmS depends on growth conditions. (A) *E. coli*  
1072 MG1655 wild-type,  $\Delta rapZ733$ ,  $\Delta glmZ1000::cat^+$ , or  $\Delta glmY1000::cat^+$  were grown at  
1073 37°C to  $A_{600}=0.2-0.4$  in LB (black circles) and then shifted to minimal medium for 2  
1074 hours (white circles)(n=4,  $\pm$  SD). (B) *E. coli* MG1655 wild-type containing plasmids  
1075 pBAD18 (VOC) or pGLMS1 (*glmS*<sup>+</sup>) were grown at 37°C to  $A_{600}=0.2-0.4$  in LB  
1076 containing 2 g l<sup>-1</sup> arabinose (black circles) and then shifted to minimal medium  
1077 supplemented with 2 g l<sup>-1</sup> arabinose for 2 hours (white circles)(n=3,  $\pm$  SD). (C) *E. coli*  
1078 MG1655 wild-type containing plasmids pBAD18 or pGLMS1 were grown at 37°C to  
1079  $A_{600}=0.2-0.4$  in LB containing 2 g l<sup>-1</sup> arabinose (black circles) and then shifted to  
1080 minimal medium containing 4 g l<sup>-1</sup> arabinose as a sole carbon source for 2 hours (white  
1081 circles)(n=3,  $\pm$  SD). (D) *E. coli* MG1655 wild-type,  $\Delta rapZ733$ ,  $\Delta glmZ1000::cat^+$ , or  
1082  $\Delta glmY1000::cat^+$  were grown at 37°C to  $A_{600}=0.2-0.4$  in LBQ (black circles) and then  
1083 shifted to minimal medium containing for 2 hours (white circles)(n=3-4,  $\pm$  SD). (E) *E. coli*  
1084 MG1655 wild-type containing plasmids pBAD18 or pGLMS1 were grown at 37°C to  
1085  $A_{600}=0.2-0.4$  in LBQ containing 2 g l<sup>-1</sup> arabinose (black circles) and then shifted to

1086 minimal medium supplemented with 2 g l<sup>-1</sup> arabinose for 2 hours (white circles)(n=3, ±  
1087 SD). (F) *E. coli* MG1655 wild-type was grown at 37°C to A<sub>600</sub>=0.2–0.4 in LB (black  
1088 circles) and then shifted to minimal media containing either 4 g l<sup>-1</sup> glucose, 8 g l<sup>-1</sup>  
1089 glycerol, or 4 g l<sup>-1</sup> glucosamine as sole carbon sources for 2 hours (white circles)(n=3-4,  
1090 ± SD). PolyP concentrations are in terms of individual phosphate monomers. Asterisks  
1091 indicate polyP levels significantly different from those of the wild-type control for a given  
1092 experiment unless otherwise indicated (two-way repeated measures ANOVA with Holm-  
1093 Sidak's multiple comparisons test, ns = not significant \* = P<0.05, \*\* = P<0.01, \*\*\* =  
1094 P<0.001, \*\*\*\* = P<0.0001).

1095

1096 **FIG 5** PtsN positively regulates polyP synthesis regardless of its phosphorylation state  
1097 or the presence of glutamine, but does not do so by interacting directly with PPK. (A)  
1098 Diagram of the nitrogen phosphotransferase system of *E. coli*. (B,C) MG1655 wild-type,  
1099  $\Delta ptsN732$ ,  $\Delta npr-734::kan^+$ , or  $\Delta ptsP753::kan^+$  were grown at 37°C to A<sub>600</sub>=0.2–0.4 in LB  
1100 (panel A) or LBQ (panel B) (black circles) and then shifted to minimal medium for 2  
1101 hours (white circles)(n=3, ± SD). (D) MG1655  $\Delta ptsN732$  containing the indicated  
1102 plasmids was grown at 37°C to A<sub>600</sub>=0.2–0.4 in LB containing 2 g l<sup>-1</sup> arabinose (black  
1103 circles) and then shifted to minimal medium supplemented with 2 g l<sup>-1</sup> arabinose for 2  
1104 hours (white circles)(n=3, ± SD). VOC is pBAD18. PolyP concentrations are in terms of  
1105 individual phosphate monomers. Asterisks indicate polyP levels significantly different  
1106 from those of the wild-type or  $\Delta ptsN$  / VOC control for a given experiment unless  
1107 otherwise indicated (two-way repeated measures ANOVA with Holm-Sidak's multiple  
1108 comparisons test, ns = not significant \* = P<0.05, \*\* = P<0.01, \*\*\* = P<0.001, \*\*\*\* =

1109  $P < 0.0001$ ). (E) *E. coli* BTH101 (*cya*<sup>-</sup>) containing plasmids expressing the indicated  
1110 protein fusions were grown overnight in LB and either spotted on LB medium containing  
1111 0.5 mM IPTG and 40  $\mu\text{g ml}^{-1}$  X-Gal or lysed for quantitative assay of  $\beta$ -galactosidase  
1112 activity ( $n=3$ ,  $\pm$  SD; ND = not detectable). (F) Specific activity of purified PPK in the  
1113 presence of the indicated compounds ( $n=3$ ,  $\pm$ SD; one-way ANOVA, ns = not  
1114 significant).

1115

1116 **FIG 6** Effect of polyP-inducing nutrient limitation on PtsN levels *in vivo*. *E. coli* MG1655  
1117 (A) *ptsN*-3xFLAG, (B)  $\Delta$ *phoP790::kan*<sup>+</sup> *ptsN*-3xFLAG, or (C)  $\Delta$ *rpoN730 ptsN*-3xFLAG  
1118 strains were grown at 37°C to  $A_{600}=0.2-0.4$  in LB and then shifted to minimal medium  
1119 for 2 hours. At the indicated timepoints, protein samples ( $n=3$ ,  $\pm$ SD) were collected and  
1120 immunoblotted to quantify PtsN-3xFLAG and RecA. Representative blots are shown.  
1121 Full gels are shown in Supplemental Fig. S3. Asterisks indicate normalized PtsN levels  
1122 significantly different from those of the wild-type at the indicated timepoint (two-way  
1123 repeated measures ANOVA with Holm-Sidak's multiple comparisons test, \*\* =  $P < 0.01$ ).

1124

1125 **FIG 7** PtsN acts downstream of RpoN, upstream of DksA, and independently of RpoE in  
1126 polyP regulation. MG1655  $\Delta$ *ptsN732* (panels A, B)  $\Delta$ *rpoN730* (panel C),  
1127  $\Delta$ *dksA1000::cat*<sup>+</sup> (panel D), or  $\Delta$ *rpoE1000::kan*<sup>+</sup> (panel E) strains containing the  
1128 indicated plasmids were grown at 37°C to  $A_{600}=0.2-0.4$  in LB containing 2 g l<sup>-1</sup>  
1129 arabinose (black circles) and then shifted to minimal medium supplemented with 2 g l<sup>-1</sup>  
1130 arabinose for 2 hours (white circles)( $n=3$ ,  $\pm$  SD). VOC for panel A is pBAD24 and for  
1131 panels B-E is pBAD18, and both the LB and minimal medium contained 10  $\mu\text{g ml}^{-1}$

1132 erythromycin for the experiment shown in panel E. PolyP concentrations are in terms of  
1133 individual phosphate monomers. Asterisks indicate polyP levels significantly different  
1134 from those of the VOC control for a given experiment (two-way repeated measures  
1135 ANOVA with Holm-Sidak's multiple comparisons test, ns = not significant \* =  $P < 0.05$ , \*\*  
1136 =  $P < 0.01$ , \*\*\* =  $P < 0.001$ , \*\*\*\* =  $P < 0.0001$ ).

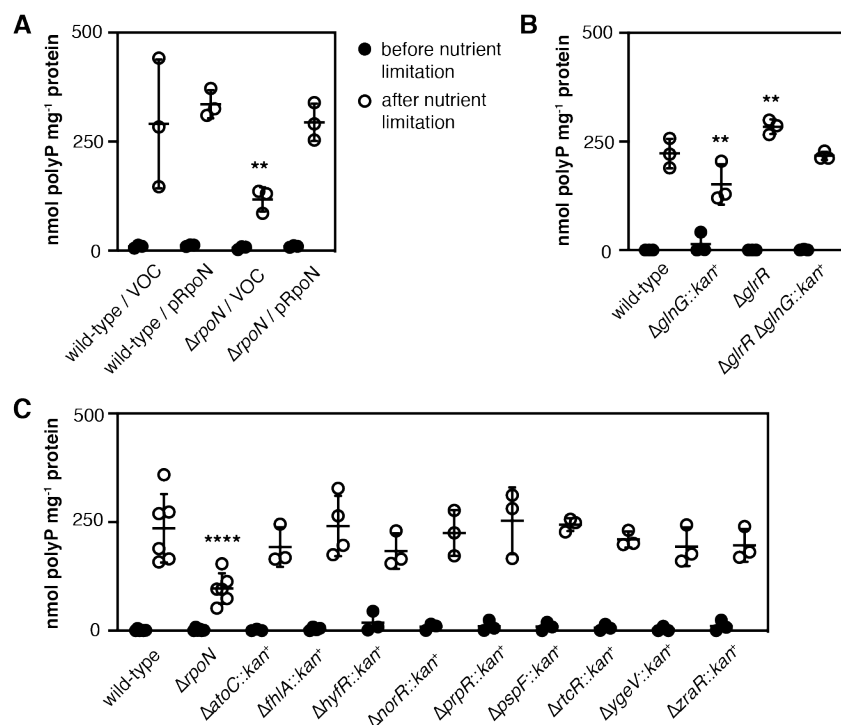

1  
2 **FIG 1** The bEBPs GlnG and GlrR influence polyP production. (A) *E. coli* MG1655 wild-  
3 type or  $\Delta rpoN730$  containing either pBAD24 (VOC) or pRpoN ( $rpoN^+$ ) plasmids were  
4 grown at 37°C to  $A_{600}=0.2-0.4$  in LB containing 2 g l<sup>-1</sup> arabinose (black circles) and then  
5 shifted to minimal medium containing 2 g l<sup>-1</sup> arabinose for 2 hours (white circles)(n=3,  $\pm$   
6 SD). (B) MG1655 wild-type,  $\Delta glnG730::kan^+$ ,  $\Delta glrR728$ , or  $\Delta glrR728 \Delta glnG730::kan^+$   
7 were grown at 37°C to  $A_{600}=0.2-0.4$  in LB (black circles) and then shifted to minimal  
8 medium for 2 hours (white circles)(n=3,  $\pm$  SD). (C) MG1655 wild-type,  $\Delta rpoN730$ ,  
9  $\Delta atoC774::kan^+$ ,  $\Delta hyfR739::kan^+$ ,  $\Delta norR784::kan^+$ ,  $\Delta prpR772::kan^+$ ,  $\Delta pspF739::kan^+$ ,  
10  $\Delta rtcR755::kan^+$ ,  $\Delta ygeV720::kan^+$ , or  $\Delta zraR775::kan^+$  were grown at 37°C to  $A_{600}=0.2-$   
11  $0.4$  in LB (black circles) and then shifted to minimal medium for 2 hours (white  
12 circles)(n=3-6,  $\pm$  SD). PolyP concentrations are in terms of individual phosphate  
13 monomers. Asterisks indicate polyP levels significantly different from those of the wild-



- 14 type control for a given experiment (two-way repeated measures ANOVA with Holm-
- 15 Sidak's multiple comparisons test, \*\* =  $P < 0.01$ , \*\*\*\* =  $P < 0.0001$ ).
- 16

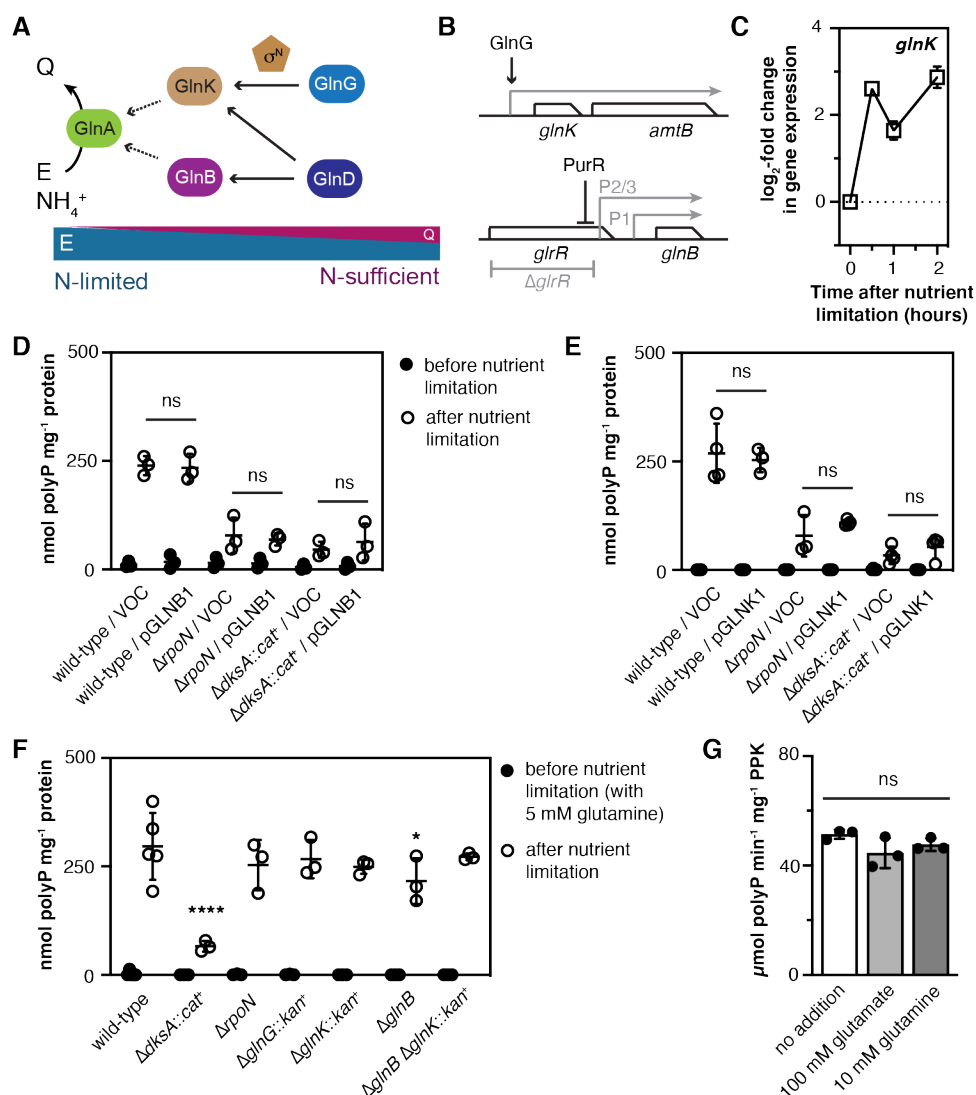

17

18 **FIG 2** RpoN-dependent regulation of polyP synthesis is dependent on cellular nitrogen

19 status, but not on GlnB or GlnK *per se*. (A) Simplified model of the regulation of GlnA

20 (glutamine synthetase) activity in response to changes in the intracellular glutamate (E)

21 to glutamine (Q) ratio. (B) Diagram of the *glnK* and *glnB* loci in *E. coli*. (C) *E. coli*

22 MG1655 wild-type was grown at 37°C to A<sub>600</sub>=0.2–0.4 in rich medium (LB) and then

23 shifted to minimal medium (MOPS with no amino acids, 4 g l<sup>-1</sup> glucose, 0.1 mM

24 K<sub>2</sub>HPO<sub>4</sub>, 0.1 mM uracil) for 2 hours. qRT-PCR was used to measure fold changes in

25 *glnK* transcript abundance at the indicated timepoints (n=3, ± SD), normalized to

26 expression before stress treatment (t = 0 h). (D, E) *E. coli* MG1655 wild-type,  $\Delta rpoN730$ ,  
27 or  $\Delta dksA1000::cat^+$  containing either pBAD18 (VOC), pGLNB1 (*glnB*<sup>+</sup>) or pGLNK1  
28 (*glnK*<sup>+</sup>) plasmids were grown at 37°C to  $A_{600}=0.2-0.4$  in LB containing 2 g l<sup>-1</sup> arabinose  
29 (black circles) and then shifted to minimal medium supplemented with 2 g l<sup>-1</sup> arabinose  
30 for 2 hours (white circles)(n=3-4,  $\pm$  SD). (F) MG1655 wild-type,  $\Delta dksA1000::cat^+$ ,  
31  $\Delta glnG730::kan^+$ ,  $\Delta glnK736::kan^+$ ,  $\Delta glnB727$ , or  $\Delta glnB727 \Delta glnK736::kan^+$  were grown at  
32 37°C to  $A_{600}=0.2-0.4$  in LBQ (black circles) and then shifted to minimal medium for 2  
33 hours (white circles)(n=3-5,  $\pm$  SD). PolyP concentrations are in terms of individual  
34 phosphate monomers. Asterisks indicate polyP levels significantly different from those  
35 of the wild-type control for a given experiment (two-way repeated measures ANOVA  
36 with Holm-Sidak's multiple comparisons test, ns = not significant \* = P<0.05, \*\* =  
37 P<0.01, \*\*\*\* = P<0.0001). (G) Specific activity of purified PPK in the presence of the  
38 indicated compounds (n=3,  $\pm$ SD; one-way ANOVA, ns = not significant).  
39

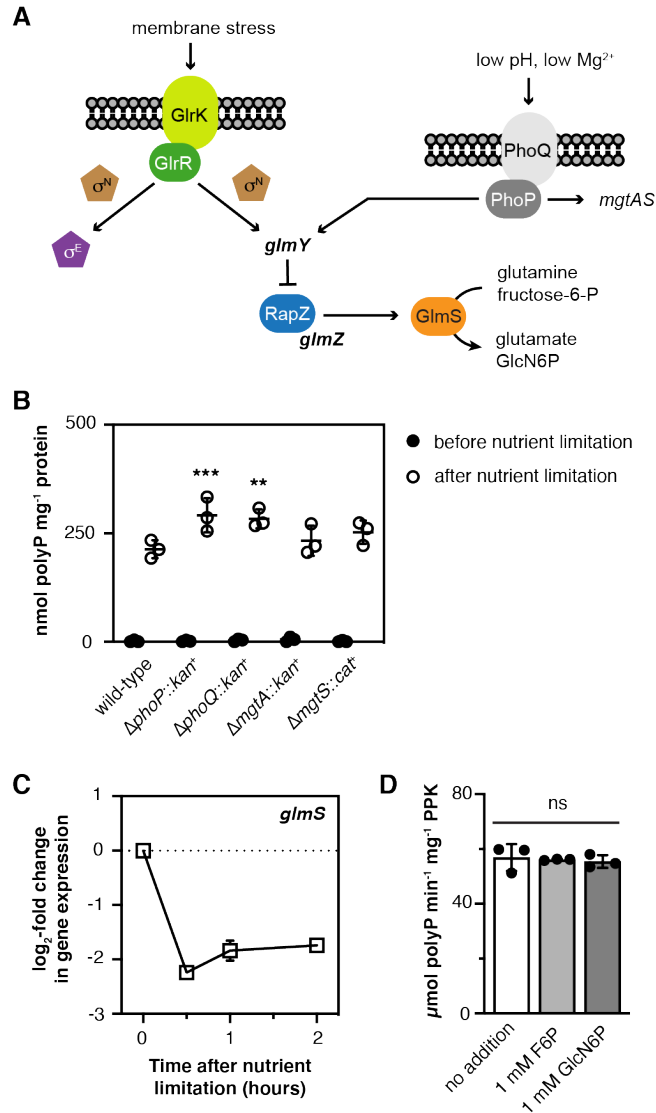

40

41 **FIG 3** Effect of *glmY* and GlmS (glutamine--fructose-6-phosphate aminotransferase)

42 regulation on polyP production. (A) Diagram of the GlrR- and PhoP-dependent

43 pathways which regulate GlmS expression in *E. coli*. (B) MG1655 wild-type,

44  $\Delta$ *phoP790::kan<sup>r</sup>*,  $\Delta$ *phoQ789::kan<sup>r</sup>*,  $\Delta$ *mgtA789::kan<sup>r</sup>*, or  $\Delta$ *mgtS1000::cat<sup>r</sup>* were grown at

45 37°C to A<sub>600</sub>=0.2–0.4 in LB (black circles) and then shifted to minimal medium for 2

46 hours (white circles)(n=3, ± SD). (C) *E. coli* MG1655 wild-type was grown at 37°C to

47 A<sub>600</sub>=0.2–0.4 in rich medium (LB) and then shifted to minimal medium (MOPS with no

48 amino acids, 4 g l<sup>-1</sup> glucose, 0.1 mM K<sub>2</sub>HPO<sub>4</sub>, 0.1 mM uracil) for 2 hours. qRT-PCR was

49 used to measure fold changes in *glmS* transcript abundance at the indicated timepoints  
50 (n=3,  $\pm$  SD), normalized to expression before stress treatment (t = 0 h). (D) Specific  
51 activity of purified PPK in the presence of the indicated compounds (n=3,  $\pm$ SD; one-way  
52 ANOVA, ns = not significant).

53

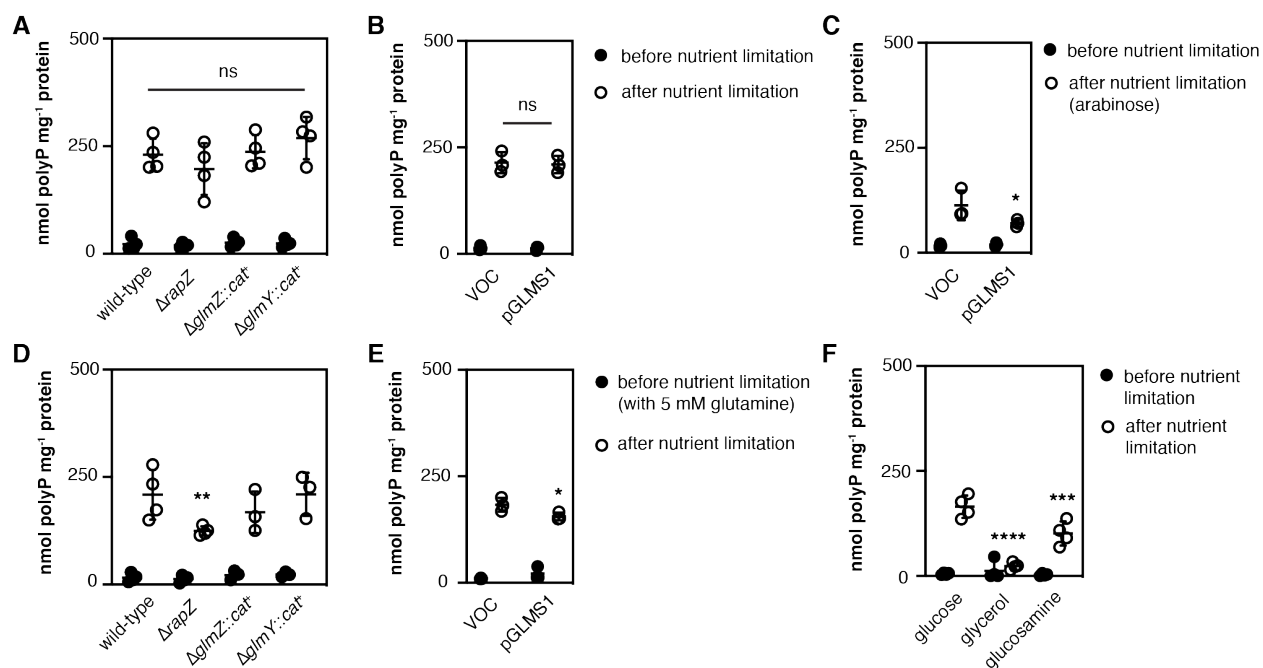

54

55 **FIG 4** PolyP regulation by RapZ and GlmS depends on growth conditions. (A) *E. coli*  
 56 MG1655 wild-type,  $\Delta rapZ733$ ,  $\Delta glmZ1000::cat^+$ , or  $\Delta glmY1000::cat^+$  were grown at  
 57 37°C to  $A_{600}=0.2-0.4$  in LB (black circles) and then shifted to minimal medium for 2  
 58 hours (white circles)( $n=4$ ,  $\pm$  SD). (B) *E. coli* MG1655 wild-type containing plasmids  
 59 pBAD18 (VOC) or pGLMS1 ( $glmS^+$ ) were grown at 37°C to  $A_{600}=0.2-0.4$  in LB  
 60 containing 2 g l<sup>-1</sup> arabinose (black circles) and then shifted to minimal medium  
 61 supplemented with 2 g l<sup>-1</sup> arabinose for 2 hours (white circles)( $n=3$ ,  $\pm$  SD). (C) *E. coli*  
 62 MG1655 wild-type containing plasmids pBAD18 or pGLMS1 were grown at 37°C to  
 63  $A_{600}=0.2-0.4$  in LB containing 2 g l<sup>-1</sup> arabinose (black circles) and then shifted to  
 64 minimal medium containing 4 g l<sup>-1</sup> arabinose as a sole carbon source for 2 hours (white  
 65 circles)( $n=3$ ,  $\pm$  SD). (D) *E. coli* MG1655 wild-type,  $\Delta rapZ733$ ,  $\Delta glmZ1000::cat^+$ , or  
 66  $\Delta glmY1000::cat^+$  were grown at 37°C to  $A_{600}=0.2-0.4$  in LBQ (black circles) and then  
 67 shifted to minimal medium containing for 2 hours (white circles)( $n=3-4$ ,  $\pm$  SD). (E) *E. coli*  
 68 MG1655 wild-type containing plasmids pBAD18 or pGLMS1 were grown at 37°C to

69  $A_{600}=0.2-0.4$  in LBQ containing  $2 \text{ g l}^{-1}$  arabinose (black circles) and then shifted to  
70 minimal medium supplemented with  $2 \text{ g l}^{-1}$  arabinose for 2 hours (white circles)( $n=3, \pm$   
71 SD). (F) *E. coli* MG1655 wild-type was grown at  $37^{\circ}\text{C}$  to  $A_{600}=0.2-0.4$  in LB (black  
72 circles) and then shifted to minimal media containing either  $4 \text{ g l}^{-1}$  glucose,  $8 \text{ g l}^{-1}$   
73 glycerol, or  $4 \text{ g l}^{-1}$  glucosamine as sole carbon sources for 2 hours (white circles)( $n=3-4,$   
74  $\pm$  SD). PolyP concentrations are in terms of individual phosphate monomers. Asterisks  
75 indicate polyP levels significantly different from those of the wild-type control for a given  
76 experiment unless otherwise indicated (two-way repeated measures ANOVA with Holm-  
77 Sidak's multiple comparisons test, ns = not significant \* =  $P<0.05$ , \*\* =  $P<0.01$ , \*\*\* =  
78  $P<0.001$ , \*\*\*\* =  $P<0.0001$ ).

79

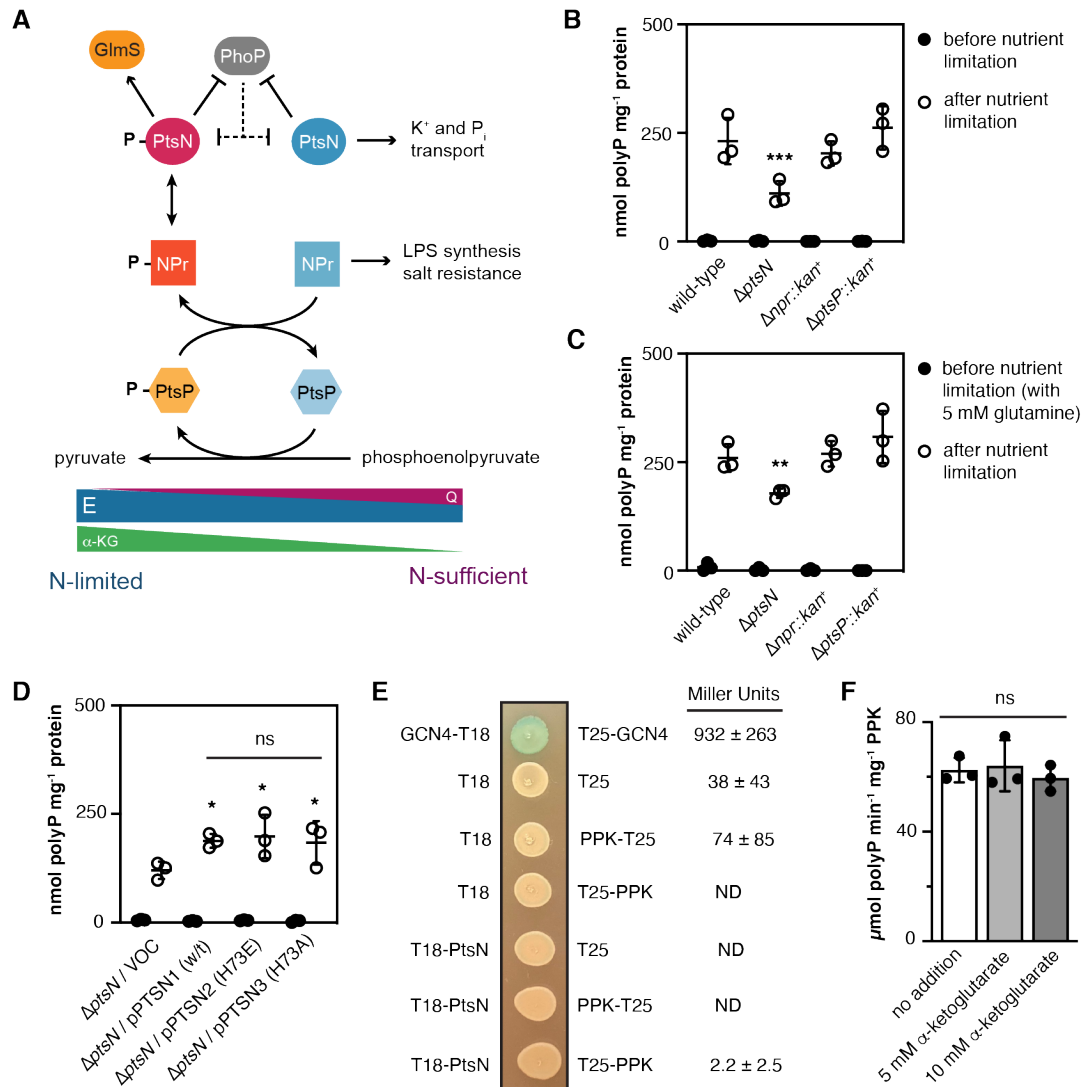

80

81 **FIG 5** PtsN positively regulates polyP synthesis regardless of its phosphorylation state  
 82 or the presence of glutamine, but does not do so by interacting directly with PPK. (A)  
 83 Diagram of the nitrogen phosphotransferase system of *E. coli*. (B,C) MG1655 wild-type,  
 84  $\Delta ptsN732$ ,  $\Delta npr-734::kan^+$ , or  $\Delta ptsP753::kan^+$  were grown at 37°C to  $A_{600}=0.2-0.4$  in LB  
 85 (panel A) or LBQ (panel B) (black circles) and then shifted to minimal medium for 2  
 86 hours (white circles)( $n=3$ ,  $\pm$  SD). (D) MG1655  $\Delta ptsN732$  containing the indicated  
 87 plasmids was grown at 37°C to  $A_{600}=0.2-0.4$  in LB containing 2 g l<sup>-1</sup> arabinose (black  
 88 circles) and then shifted to minimal medium supplemented with 2 g l<sup>-1</sup> arabinose for 2



89 hours (white circles)(n=3,  $\pm$  SD). VOC is pBAD18. PolyP concentrations are in terms of  
90 individual phosphate monomers. Asterisks indicate polyP levels significantly different  
91 from those of the wild-type or  $\Delta ptsN$  / VOC control for a given experiment unless  
92 otherwise indicated (two-way repeated measures ANOVA with Holm-Sidak's multiple  
93 comparisons test, ns = not significant \* = P<0.05, \*\* = P<0.01, \*\*\* = P<0.001, \*\*\*\* =  
94 P<0.0001). (E) *E. coli* BTH101 (*cya*<sup>-</sup>) containing plasmids expressing the indicated  
95 protein fusions were grown overnight in LB and either spotted on LB medium containing  
96 0.5 mM IPTG and 40  $\mu\text{g ml}^{-1}$  X-Gal or lysed for quantitative assay of  $\beta$ -galactosidase  
97 activity (n=3,  $\pm$  SD; ND = not detectable). (F) Specific activity of purified PPK in the  
98 presence of the indicated compounds (n=3,  $\pm$ SD; one-way ANOVA, ns = not  
99 significant).

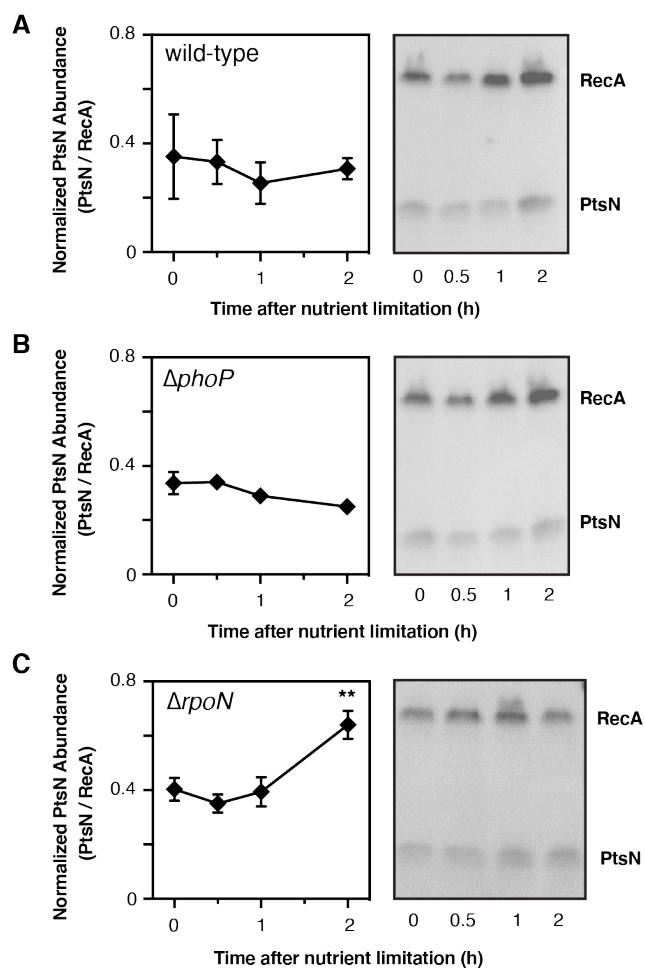

101

102 **FIG 6** Effect of polyP-inducing nutrient limitation on PtsN levels *in vivo*. *E. coli* MG1655

103 (A) *ptsN*-3xFLAG, (B)  $\Delta phoP790::kan^+$  *ptsN*-3xFLAG, or (C)  $\Delta rpoN730$  *ptsN*-3xFLAG

104 strains were grown at 37°C to  $A_{600}=0.2-0.4$  in LB and then shifted to minimal medium

105 for 2 hours. At the indicated timepoints, protein samples ( $n=3$ ,  $\pm$ SD) were collected and

106 immunoblotted to quantify PtsN-3xFLAG and RecA. Representative blots are shown.

107 Full gels are shown in Supplemental Fig. S3. Asterisks indicate normalized PtsN levels

108 significantly different from those of the wild-type at the indicated timepoint (two-way

109 repeated measures ANOVA with Holm-Sidak's multiple comparisons test, \*\* =  $P<0.01$ ).

110

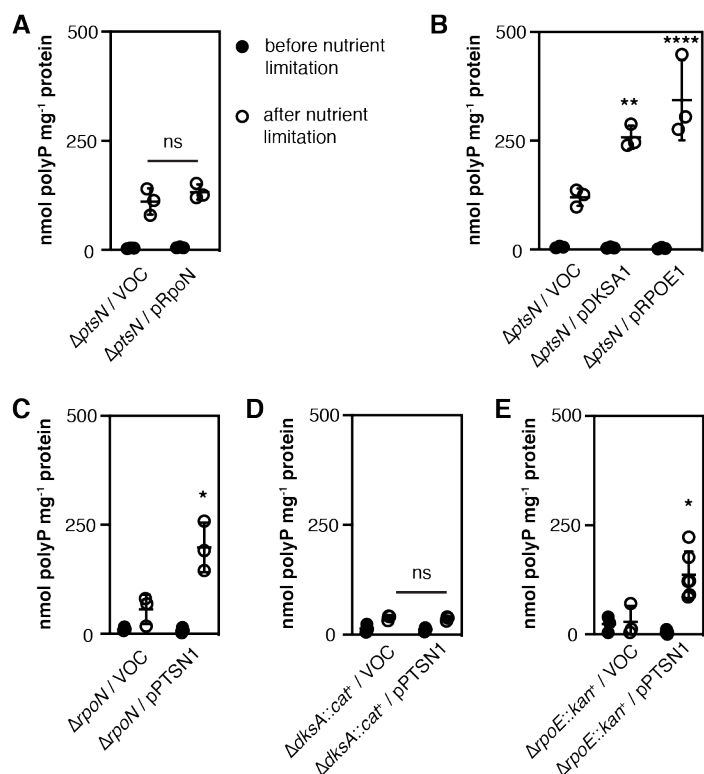

111

112 **FIG 7** PtsN acts downstream of RpoN, upstream of DksA, and independently of RpoE in

113 polyP regulation. MG1655  $\Delta ptsN732$  (panels A, B)  $\Delta rpoN730$  (panel C),

114  $\Delta dksA1000::cat^+$  (panel D), or  $\Delta rpoE1000::kan^+$  (panel E) strains containing the

115 indicated plasmids were grown at 37°C to  $A_{600}=0.2-0.4$  in LB containing 2 g l<sup>-1</sup>

116 arabinose (black circles) and then shifted to minimal medium supplemented with 2 g l<sup>-1</sup>

117 arabinose for 2 hours (white circles)(n=3,  $\pm$  SD). VOC for panel A is pBAD24 and for

118 panels B-E is pBAD18, and both the LB and minimal medium contained 10  $\mu$ g ml<sup>-1</sup>

119 erythromycin for the experiment shown in panel E. PolyP concentrations are in terms of

120 individual phosphate monomers. Asterisks indicate polyP levels significantly different

121 from those of the VOC control for a given experiment (two-way repeated measures

122 ANOVA with Holm-Sidak's multiple comparisons test, ns = not significant \* = P<0.05, \*\*

123 = P<0.01, \*\*\* = P<0.001, \*\*\*\* = P<0.0001).
